# Supplementary material for: A comprehensive study of the molecular vibrations in solid-state benzylic amide [2]catenane
Source: Royal Society of Chemistry journal article supplement (doi:10.1039/c9cp03053k), 2019-01-01
Supplement: c9cp03053k1.pdf [file c9cp03053k1.pdf]

**ELECTRONIC SUPPLEMENTARY INFORMATION:**  
**A Comprehensive Study of the Molecular Vibrations**  
**in Solid-State Benzylic Amide [2]Catenane:**

Carlos Romero Muñiz<sup>1</sup>, Denís Paredes-Roibás<sup>2</sup>,  
Antonio Hernanz<sup>2</sup>, José María Gavira-Vallejo<sup>2</sup>

<sup>1</sup> *Departamento de Física Teórica de la Materia Condensada, Universidad Autónoma de Madrid, E-28049 Madrid, Spain*

<sup>2</sup> *Departamento de Ciencias y Técnicas Fisicoquímicas, Facultad de Ciencias, Universidad Nacional de Educación a Distancia (UNED), Paseo de la Senda del Rey 9, E-28040 Madrid, Spain*

We include here two additional tables (Table S1 and Table S2).

In Table S1 we show a comparison between the main peaks of the experimental IR spectrum and those of the theoretical calculation. For each peak, the most relevant discrete normal modes are selected. The description of normal modes is made in terms of usual internal vibrational coordinates. They are ordered by decreasing contribution to the corresponding normal mode.

In Table S2 we include a description of over 1000 vibrational modes of the catenane crystal. We include the observed peaks in the experimental and theoretical spectra and a brief description of the modes in terms of usual internal vibrational coordinates, ordered by decreasing relevance. The last column is the calculated IR activity expressed with respect to the most active mode. Those modes with a remarkable IR activity are highlighted in red and are the ones included in the discussion of the main text and Table S1). The modes highlighted in green are those relevant in Raman spectroscopy.

These tables contain the following abbreviations and symbols:

Vibrational modes:

v: stretching

$\delta$ : in-plane bending

$\pi$ : out-of-plane bending

sci: scissoring

$\tau$ : torsion

$\omega$ : wagging

Other notations:

a: antisymmetric

r: benzene ring

rd: benzene ring deformation

rb: benzene ring breathing

s: symmetric

\*: hydrogen bond

\*\* : Peaks not observed in the IR spectrum but relevant in Raman

Table S1

| Peaks (cm <sup>-1</sup> ) |         | Mode              | v <sub>n</sub>      | Description                                          |
|---------------------------|---------|-------------------|---------------------|------------------------------------------------------|
| (exp.)                    | (calc.) |                   | (cm <sup>-1</sup> ) |                                                      |
| --                        | --      | 1537 <sup>1</sup> | 113.0               | πCCCN                                                |
| 477                       | 478     | 1230              | 477.4               | s-out-of-plane-rd + δCCN + vCN + δCNC                |
|                           |         | 1226              | 479.2               | s-out-of-plane-rd + δCCN + δCNC + vCN                |
| 502                       | 499     | 1216              | 499.2               | vCN + δCNC + δCCN + s-out-of-plane-rd                |
|                           | 511     | 1208              | 512.0               | vCN + δCCN + s-out-of-plane-rd + δCNC                |
| 604                       | 599     | 1181              | 598.5               | δCCN + s-out-of-plane-rd + δCNC + vCN                |
|                           |         | 1179              | 599.8               | δCCN + s-out-of-plane-rd + δCNC + vCN                |
| 609                       | 605     | 1171              | 606.7               | s-out-of-plane-rd + δCNC + δCCN + vCN                |
| 623                       | 629     | 1165              | 628.5               | a-in-plane-rd + r-vCH + πCCNH                        |
|                           |         | 1163              | 632.1               | a-in-plane-rd + r-vCH + πCCNH                        |
| 641                       | 635     | 1151              | 635.9               | a-in-plane-rd + r-vCH                                |
| 654                       | 646     | 1135              | 646.6               | a-in-plane-rd + r-vCH + δCNC + δCCN                  |
| 669                       | 666     | 1128              | 665.2               | s-out-of-plane-rd + δCNC + δCCN + vCN                |
|                           |         | 1121              | 667.8               | s-out-of-plane-rd + δCNC + δCCN + vCN                |
| 690                       | 682     | 1111              | 681.9               | s-out-of-plane-rd + δCNC + δCCN + vCN + vCC          |
|                           |         | 1110              | 682.8               | s-out-of-plane-rd + δCNC + δCCN + vCN + vCC          |
| 705                       | 688     | 1100              | 688.6               | s-in-plane-rd + πCCNH + δCNC + vCC + vCN             |
|                           |         | 1099              | 688.6               | s-in-plane-rd + πCCNH + δCNC + vCC + vCN             |
|                           |         | 1098              | 689.2               | s-in-plane-rd + πCCNH + δCCN + vCC + vCN             |
| 725                       | 700     | 1088              | 699.5               | πCCNH + δCCN + vCC + vCN + s-out-of-plane-rd         |
|                           |         | 1085              | 700.4               | πCCNH + vCC + vCN + δCCN + s-out-of-plane-rd         |
| 732                       | 705     | 1078              | 705.0               | πCCNH + vCC + vCN + δCCN + s-out-of-plane-rd         |
|                           |         | 1077              | 705.1               | πCCNH + vCC + vCN + δCCN + s-out-of-plane-rd         |
| 778                       | 770     | 1025              | 769.9               | δCCN + δCNC + vCC + a-out-of-plane-rd                |
|                           |         | 1021              | 770.6               | s-out-of-plane-rd + δCCN + vCC + δCNC                |
| 785                       | 783     | 1015              | 783.2               | s-out-of-plane-rd + δCCN + vCC + δCNC                |
| 801                       | 808     | 995               | 809.0               | s-out-of-plane-rd + δCCN + vCN                       |
| 813                       | 813     | 992               | 813.6               | s-in-plane-rd + δCCN + vCC                           |
| 822                       | 821     | 979               | 820.6               | s-out-of-plane-rd + δCCN + vCC                       |
|                           |         | 977               | 822.1               | s-out-of-plane-rd + δCCN + vCC + r-vCH               |
| 857                       | 861     | 936               | 861.2               | s-out-of-plane-rd + δCCN + vCN                       |
| 993                       | 984     | 823               | 985.1               | s-out-of-plane-rd + δCCN + δCNC                      |
| 1083                      | 1092    | 727               | 1092.3              | a-in-plane-rd + δCCC + δCCN                          |
|                           |         | 726               | 1092.9              | a-in-plane-rd + δCCC + δCCN                          |
| 1220                      | 1224    | 600               | 1225.5              | τCH <sub>2</sub> + δCCN + vCC + δCNC + s-in-plane-rd |
| 1246                      | 1246    | 584               | 1246.8              | τCH <sub>2</sub> + δCCN + δCNC + a-in-plane-rd       |
| 1264                      | 1266    | 575               | 1266.2              | δCCN + δCNC + vCC + vCN                              |
|                           |         | 574               | 1266.2              | δCCN + vCC + vCN + δCNC                              |
|                           |         | 571               | 1267.2              | vCN + vCC + δCCN + a-in-plane-rd                     |
| 1270                      | 1278    | 566               | 1278.1              | vCC + vCN + δCCN + a-in-plane-rd                     |
|                           |         | 563               | 1280.7              | δCCN + vCC + vCN + δCNC                              |
|                           |         | 561               | 1282.1              | δCCN + vCC + vCN + a-in-plane-rd                     |
| 1284                      | 1285    | 560               | 1286.4              | vCC + vCN + δCCN + s-in-plane-rd                     |
|                           |         | 556               | 1287.0              | vCC + δCCN + vCN + a-in-plane-rd                     |
| 1302                      | 1303    | 542               | 1303.5              | vCC + δCCN + vCN + a-in-plane-rd                     |

<sup>1</sup> This mode has been included in the table due to its remarkable activity although it falls outside of the experimental wavenumber range.

Table S1

| Peaks (cm <sup>-1</sup> ) |         | Mode                                   | v <sub>n</sub>      | Description                            |
|---------------------------|---------|----------------------------------------|---------------------|----------------------------------------|
| (exp.)                    | (calc.) |                                        | (cm <sup>-1</sup> ) |                                        |
|                           |         | 538                                    | 1304.9              | δCCN + a-in-plane-rd + vCC + vCN       |
| 1323                      | 1317    | 514                                    | 1319.6              | δCCN + δCNC + ωCH2                     |
| 1355                      | 1348    | 472                                    | 1364.5              | a-in-plane-rd + δCCN                   |
|                           |         | 469                                    | 1364.8              | a-in-plane-rd + vCC                    |
| 1421                      | 1418    | 435                                    | 1414.2              | a-in-plane-rd + δCCN + vCN             |
|                           |         | 423                                    | 1418.2              | a-in-plane-rd + δCCN                   |
| 1477                      | 1472    | 374                                    | 1472.7              | vCC + a-in-plane-rd + vCN              |
|                           |         | 372                                    | 1473.0              | vCC + s-in-plane-rd + vCN              |
| 1501                      | 1505    | 367                                    | 1505.0              | vCC + s-in-plane-rd                    |
| 1530                      | 1521    | 352                                    | 1520.3              | vCN + δCNH + vCC + vNC                 |
|                           |         | 351                                    | 1520.4              | vCC + vCN + δCNH + vNC                 |
|                           |         | 350                                    | 1521.0              | vCN + vCC + δCNH + vNC                 |
|                           |         | 349                                    | 1521.0              | vCN + vCC + δCNH + vNC                 |
|                           |         | 348                                    | 1521.1              | vCN + δCNH + vNC + vCC                 |
|                           |         | 347                                    | 1521.1              | vCN + vCC + δCNH + vNC                 |
|                           |         | 345                                    | 1521.5              | vCN + vCC + δCNH + vNC                 |
|                           |         | 343                                    | 1522.0              | vCN + vCC + δCNH + vNC                 |
| 1535                      | 1528    | 336                                    | 1527.7              | vCN + vCC + vNC + δCNH                 |
|                           |         | 334                                    | 1529.0              | vCN + vCC + vNC + δCNH                 |
| 1546                      | 1537    | 324                                    | 1537.2              | vCN + vNC+ δCNH                        |
| 1579                      | 1574    | 312                                    | 1572.8              | vCC + a-in-plane-rd + vCO + δCCN       |
|                           |         | 311                                    | 1573.0              | vCC + s-in-plane-rd + vCO + δCCN       |
|                           |         | 308                                    | 1573.5              | vCC + vCO + δCCN + s-in-plane-rd       |
|                           |         | 307                                    | 1573.6              | vCC + vCO + δCCN + s-in-plane-rd       |
|                           |         | 304                                    | 1574.8              | vCC + vCO + δCCN + a-in-plane-rd       |
|                           |         | 302                                    | 1575.2              | vCC + δCCN + in-plane-rd               |
| 1602                      | 1592    | 284                                    | 1592.6              | vCO + vCC + δCCN + a-in-plane-rd       |
|                           |         | 283                                    | 1592.6              | vCO + vCC + δCCN + a-in-plane-rd       |
|                           |         | 282                                    | 1592.9              | vCO + s-in-plane-rd + vCC + δCCN       |
|                           |         | 281                                    | 1593.0              | vCC + vCO + s-in-plane-rd + vCN + δCCN |
|                           | 2598    | 274                                    | 1597.9              | vCC + a-in-plane-rd                    |
| 273                       | 1598.2  | vCO + vCN + vCC + δCCN + a-in-plane-rd |                     |                                        |
| 1630                      | 1607    | 272                                    | 1607.7              | vCO + vCN + vCC + δCCN + a-in-plane-rd |
|                           |         | 271                                    | 1608.0              | vCO + vCN + vCC + δCCN + a-in-plane-rd |
|                           |         | 267                                    | 1609.4              | s-in-plane-rd + a-in-plane-rd          |
|                           |         | 262                                    | 1610.2              | s-in-plane-rd                          |
|                           |         | 256                                    | 1612.4              | vCO + vCC + vCN+ δCCN + s-in-plane-rd  |
| 1642                      | 1616    | 253                                    | 1613.9              | s-in-plane-rd + vCC + vCN+ vCO         |
|                           |         | 248                                    | 1616.4              | vCO + vCC + vCN+ δCCN + a-in-plane-rd  |
|                           |         | 245                                    | 1617.6              | vCO + vCC + vCN+ δCCN + a-in-plane-rd  |
|                           |         | 241                                    | 1621.4              | vCO + vCN + vCC + δCCN + s-in-plane-rd |
|                           |         | 238                                    | 1623.8              | vCO + vCN + vCC + δCCN + a-in-plane-rd |
|                           |         | 234                                    | 1626.0              | vCO + vCN + vCC + δCCN + a-in-plane-rd |
| 1661                      | 1640    | 231                                    | 1635.7              | vCO + vCN + vCC + δCCN + a-in-plane-rd |
|                           |         | 226                                    | 1640.0              | vCO + vCN + vCC + δCCN + s-in-plane-rd |
|                           |         | 225                                    | 1640.5              | vCO + vCN + vCC + δCCN + s-in-plane-rd |
| 3295                      | 3309    | 30                                     | 3309.2              | vNH + δCNC                             |
|                           |         | 27                                     | 3310.3              | vNH + δCNC + vOH*                      |

**Table S1**

| Peaks (cm <sup>-1</sup> ) |         | Mode | v <sub>n</sub>      | Description             |
|---------------------------|---------|------|---------------------|-------------------------|
| (exp.)                    | (calc.) |      | (cm <sup>-1</sup> ) |                         |
|                           |         | 25   | 3311.2              | vNH + δCNC              |
| 3325                      | 3339    | 22   | 3340.0              | vNH + δCNC + vOH*       |
|                           |         | 20   | 3340.3              | vNH + vCN + δCNC + vOH* |
|                           |         | 19   | 3340.3              | vNH + δCNC + vOH*       |
| 3363                      | 3352    | 16   | 3350.9              | vNH + δCNC + vOH*       |
|                           |         | 14   | 3351.2              | vNH + δCNC + vOH*       |
|                           |         | 13   | 3351.3              | vNH + δCNC + vOH*       |
|                           |         | 9    | 3353.1              | vNH + δCNC              |
| 3426                      | 3410    | 8    | 3409.7              | vNH + δCNC              |
|                           |         | 5    | 3410.2              | vNH + vCN + δCNC + vOH* |

Table S2

| Peaks (cm <sup>-1</sup> ) |         | Mode                                                       | $\nu_n$<br>(cm <sup>-1</sup> ) | Description                                                           | IR activity<br>(%) |
|---------------------------|---------|------------------------------------------------------------|--------------------------------|-----------------------------------------------------------------------|--------------------|
| (exp.)                    | (calc.) |                                                            |                                |                                                                       |                    |
| --                        | --      | 1537 <sup>2</sup>                                          | 113.00                         | $\pi$ CCCN                                                            | 4.18               |
| 477                       | 478     | 1232                                                       | 476.15                         | s-out-of-plane-rd + $\delta$ CCN + $\nu$ CN + $\delta$ CNC            | 0.00               |
|                           |         | 1231                                                       | 476.87                         | s-out-of-plane-rd + $\delta$ CCN + $\nu$ CN + $\delta$ CNC            | 0.00               |
|                           |         | 1230                                                       | 477.36                         | s-out-of-plane-rd + $\delta$ CCN + $\nu$ CN + $\delta$ CNC            | 1.44               |
|                           |         | 1229                                                       | 477.53                         | s-out-of-plane-rd + $\delta$ CCN + $\nu$ CN + $\delta$ CNC            | 0.03               |
|                           |         | 1228                                                       | 477.78                         | s-out-of-plane-rd + $\delta$ CCN + $\nu$ CN + $\delta$ CNC            | 0.59               |
|                           |         | 1227                                                       | 478.67                         | s-out-of-plane-rd + $\delta$ CCN + $\nu$ CN + $\delta$ CNC            | 0.00               |
|                           |         | 1226                                                       | 479.24                         | s-out-of-plane-rd + $\delta$ CCN + $\delta$ CNC + $\nu$ CN            | 1.84               |
| 486                       | 487     | 1225                                                       | 480.73                         | s-out-of-plane-rd + $\delta$ CCN + $\nu$ CN + $\delta$ CNC            | 0.02               |
|                           |         | 1224                                                       | 485.34                         | s-out-of-plane-rd + $\delta$ CCN + $\nu$ CN + $\delta$ CNC            | 0.00               |
|                           |         | 1223                                                       | 485.68                         | s-out-of-plane-rd + $\delta$ CCN + $\nu$ CN + $\delta$ CNC            | 0.01               |
|                           |         | 1222                                                       | 486.64                         | s-out-of-plane-rd + $\delta$ CCN + $\delta$ CNC + $\nu$ CN            | 0.16               |
|                           |         | 1221                                                       | 486.94                         | s-out-of-plane-rd + $\delta$ CCN + $\delta$ CNC + $\nu$ CN            | 0.12               |
|                           |         | 1220                                                       | 487.63                         | s-out-of-plane-rd + $\delta$ CCN + $\delta$ CNC + $\nu$ CN            | 0.27               |
|                           |         | 1219                                                       | 487.86                         | s-out-of-plane-rd + $\delta$ CCN + $\delta$ CNC + $\nu$ CN            | 0.00               |
| 502                       | 499     | 1218                                                       | 488.03                         | s-out-of-plane-rd + $\delta$ CCN + $\delta$ CNC + $\nu$ CN            | 0.29               |
|                           |         | 1217                                                       | 488.35                         | s-out-of-plane-rd + $\delta$ CCN + $\delta$ CNC + $\nu$ CN            | 0.23               |
|                           |         | 1216                                                       | 499.24                         | $\nu$ CN + $\delta$ CNC + $\delta$ CCN + s-out-of-plane-rd            | 4.27               |
|                           |         | 1215                                                       | 500.18                         | $\delta$ CNC + $\nu$ CN + $\delta$ CCN + s-out-of-plane-rd            | 0.00               |
|                           |         | 1214                                                       | 501.48                         | $\delta$ CNC + $\nu$ CN + s-out-of-plane-rd + $\delta$ CCN            | 0.17               |
|                           |         | 1213                                                       | 501.64                         | $\nu$ CN + $\delta$ CNC + s-out-of-plane-rd + $\delta$ CCN            | 0.00               |
|                           |         | 1212                                                       | 502.58                         | $\nu$ CN + $\delta$ CNC + s-out-of-plane-rd + $\delta$ CCN            | 0.00               |
|                           | 511     | 1211                                                       | 502.95                         | $\delta$ CCN + $\delta$ CNC + $\nu$ CN + s-out-of-plane-rd            | 0.12               |
|                           |         | 1210                                                       | 503.92                         | $\nu$ CN + $\delta$ CCN + s-out-of-plane-rd + $\delta$ CNC            | 0.00               |
|                           |         | 1209                                                       | 504.33                         | $\delta$ CCN + $\nu$ CN + s-out-of-plane-rd + $\delta$ CNC            | 0.01               |
|                           |         | 1208                                                       | 512.04                         | $\nu$ CN + $\delta$ CCN + s-out-of-plane-rd + $\delta$ CNC            | 1.65               |
|                           |         | 1207                                                       | 512.27                         | $\delta$ CCN + $\nu$ CN + s-out-of-plane-rd + $\delta$ CNC            | 0.16               |
|                           |         | 1206                                                       | 513.11                         | $\delta$ CCN + $\nu$ CN + s-out-of-plane-rd + $\delta$ CNC            | 0.00               |
|                           |         | 1205                                                       | 513.56                         | $\delta$ CCN + $\nu$ CN + s-out-of-plane-rd + $\delta$ CNC            | 0.00               |
|                           |         | 1204                                                       | 515.94                         | $\delta$ CCN + s-out-of-plane-rd + $\delta$ CNC + $\nu$ CN            | 0.00               |
| 569                       | 563     | 1203                                                       | 516.73                         | $\delta$ CCN + s-out-of-plane-rd + $\delta$ CNC + $\nu$ CN            | 0.00               |
|                           |         | 1202                                                       | 517.45                         | $\delta$ CCN + s-out-of-plane-rd + $\delta$ CNC + $\nu$ CN            | 0.71               |
|                           |         | 1201                                                       | 517.80                         | $\delta$ CCN + s-out-of-plane-rd + $\delta$ CNC + $\nu$ CN            | 0.01               |
|                           |         | 1200                                                       | 558.63                         | $\delta$ CCN + s-out-of-plane-rd + $\delta$ CNC + $\nu$ CN            | 0.00               |
|                           |         | 1199                                                       | 559.68                         | $\delta$ CCN + s-out-of-plane-rd + $\delta$ CNC + $\nu$ CN            | 0.56               |
|                           |         | 1198                                                       | 560.35                         | s-out-of-plane-rd + $\delta$ CCN + $\delta$ CNC + $\nu$ CN + $\nu$ CH | 0.00               |
|                           |         | 1197                                                       | 560.95                         | $\delta$ CCN + s-out-of-plane-rd + $\delta$ CNC + $\nu$ CN            | 0.00               |
|                           |         | 1196                                                       | 561.21                         | $\delta$ CCN + s-out-of-plane-rd + $\delta$ CNC + $\nu$ CN            | 0.00               |
|                           |         | 1195                                                       | 561.40                         | $\delta$ CCN + s-out-of-plane-rd + $\delta$ CNC + $\nu$ CN            | 0.00               |
|                           |         | 1194                                                       | 562.17                         | $\delta$ CCN + s-out-of-plane-rd + $\delta$ CNC + $\nu$ CN            | 0.03               |
|                           |         | 1193                                                       | 563.46                         | $\delta$ CCN + s-out-of-plane-rd + $\delta$ CNC + $\nu$ CN            | 0.35               |
|                           |         | 1192                                                       | 564.94                         | s-out-of-plane-rd + $\delta$ CCN + $\delta$ CNC + $\nu$ CN + $\nu$ CH | 0.15               |
|                           |         | 1191                                                       | 565.96                         | s-out-of-plane-rd + $\delta$ CCN + $\delta$ CNC + $\nu$ CN            | 0.00               |
| 1190                      | 566.73  | $\delta$ CCN + s-out-of-plane-rd + $\delta$ CNC + $\nu$ CN | 0.01                           |                                                                       |                    |
| 1189                      | 567.19  | s-out-of-plane-rd + $\delta$ CCN + $\delta$ CNC + $\nu$ CN | 0.00                           |                                                                       |                    |
| 1188                      | 568.10  | $\delta$ CCN + s-out-of-plane-rd + $\delta$ CNC + $\nu$ CN | 0.22                           |                                                                       |                    |
| 1187                      | 568.12  | s-out-of-plane-rd + $\delta$ CCN + $\delta$ CNC + $\nu$ CN | 0.16                           |                                                                       |                    |

<sup>2</sup> This mode has been included in the table due to its remarkable activity although it falls outside of the experimental wavenumber range.

Table S2

| Peaks (cm <sup>-1</sup> ) |         | Mode                              | v <sub>n</sub>      | Description                           | IR activity |
|---------------------------|---------|-----------------------------------|---------------------|---------------------------------------|-------------|
| (exp.)                    | (calc.) |                                   | (cm <sup>-1</sup> ) |                                       | (%)         |
|                           |         | 1186                              | 569.22              | δCCN + s-out-of-plane-rd + δCNC + vCN | 0.00        |
|                           |         | 1185                              | 570.09              | δCCN + s-out-of-plane-rd + δCNC + vCN | 0.00        |
| 604                       | 599     | 1184                              | 596.22              | s-out-of-plane-rd + δCCN + δCNC + vCN | 0.01        |
|                           |         | 1183                              | 597.12              | δCCN + s-out-of-plane-rd + δCNC + vCN | 0.00        |
|                           |         | 1182                              | 597.97              | s-out-of-plane-rd + δCCN + δCNC + vCN | 0.00        |
|                           |         | 1181                              | 598.47              | δCCN + s-out-of-plane-rd + δCNC + vCN | 4.22        |
|                           |         | 1180                              | 599.13              | δCCN + s-out-of-plane-rd + δCNC + vCN | 0.11        |
|                           |         | 1179                              | 599.79              | δCCN + s-out-of-plane-rd + δCNC + vCN | 3.73        |
|                           |         | 1178                              | 600.40              | δCCN + s-out-of-plane-rd + vCN        | 0.01        |
|                           |         | 1177                              | 600.95              | δCCN + s-out-of-plane-rd + δCNC + vCN | 0.01        |
| 609                       | 605     | 1176                              | 605.05              | s-out-of-plane-rd + δCCN + δCNC + vCN | 0.31        |
|                           |         | 1175                              | 605.46              | s-out-of-plane-rd + δCCN + δCNC + vCN | 0.63        |
|                           |         | 1174                              | 605.60              | δCCN + s-out-of-plane-rd + δCNC + vCN | 0.16        |
|                           |         | 1173                              | 606.29              | s-out-of-plane-rd + δCCN + δCNC + vCN | 0.42        |
|                           |         | 1172                              | 606.35              | δCCN + vCN + s-out-of-plane-rd        | 0.65        |
|                           |         | 1171                              | 606.71              | s-out-of-plane-rd + δCNC + δCCN + vCN | 1.31        |
|                           |         | 1170                              | 607.67              | s-out-of-plane-rd + δCNC + δCCN + vCN | 0.00        |
|                           |         | 1169                              | 608.09              | a-in-plane-rd + r-vCH + δCNC + δCCN   | 0.00        |
| 623                       | 629     | 1168                              | 627.05              | a-in-plane-rd + r-vCH + πCCNH + δCNC  | 0.05        |
|                           |         | 1167                              | 627.62              | a-in-plane-rd + r-vCH + πCCNH         | 0.00        |
|                           |         | 1166                              | 627.74              | a-in-plane-rd + r-vCH + πCCNH         | 0.01        |
|                           |         | 1165                              | 628.55              | a-in-plane-rd + r-vCH + πCCNH         | 7.40        |
|                           |         | 1164                              | 631.07              | a-in-plane-rd + r-vCH + πCCNH         | 0.01        |
|                           |         | 1163                              | 632.06              | a-in-plane-rd + r-vCH + πCCNH         | 1.27        |
| 641                       | 635     | 1162                              | 632.32              | a-in-plane-rd + r-vCH                 | 0.02        |
|                           |         | 1161                              | 632.48              | a-in-plane-rd + r-vCH                 | 0.15        |
|                           |         | 1160                              | 633.56              | a-in-plane-rd + r-vCH                 | 0.01        |
|                           |         | 1159                              | 633.71              | a-in-plane-rd + r-vCH                 | 0.01        |
|                           |         | 1158                              | 633.78              | a-in-plane-rd + r-vCH                 | 0.01        |
|                           |         | 1157                              | 633.92              | a-in-plane-rd + r-vCH                 | 0.18        |
|                           |         | 1156                              | 634.52              | a-in-plane-rd + r-vCH                 | 0.02        |
|                           |         | 1155                              | 634.68              | a-in-plane-rd + r-vCH                 | 0.00        |
|                           |         | 1154                              | 635.04              | a-in-plane-rd + r-vCH                 | 0.03        |
|                           |         | 1153                              | 635.12              | a-in-plane-rd + r-vCH + δCNC          | 0.01        |
|                           |         | 1152                              | 635.23              | a-in-plane-rd + r-vCH + δCNC          | 0.00        |
|                           |         | 1151                              | 635.90              | a-in-plane-rd + r-vCH                 | 5.23        |
|                           |         | 1150                              | 636.10              | a-in-plane-rd + r-vCH                 | 0.31        |
|                           |         | 1149                              | 636.39              | a-in-plane-rd + r-vCH + vCC + vCN     | 0.49        |
|                           |         | 1148                              | 636.52              | a-in-plane-rd + r-vCH + vCC + vCN     | 0.01        |
|                           |         | 1147                              | 637.26              | a-in-plane-rd + r-vCH + vCN           | 0.00        |
| 1146                      | 637.67  | a-in-plane-rd + r-vCH + vCC + vCN | 0.00                |                                       |             |
| 1145                      | 637.78  | a-in-plane-rd + r-vCH + vCC + vCN | 0.00                |                                       |             |
| 654                       | 646     | 1144                              | 643.85              | s-in-plane-rd + r-vCH + vCC + vCN     | 0.47        |
|                           |         | 1143                              | 644.24              | s-in-plane-rd + r-vCH + vCC + vCN     | 0.00        |
|                           |         | 1142                              | 644.83              | s-in-plane-rd + r-vCH + vCC + vCN     | 0.01        |
|                           |         | 1141                              | 645.14              | s-in-plane-rd + r-vCH + vCC + vCN     | 0.01        |
|                           |         | 1140                              | 645.18              | a-in-plane-rd + r-vCH + vCC + vCN     | 0.00        |
|                           |         | 1139                              | 645.21              | a-in-plane-rd + r-vCH + vCC + vCN     | 0.00        |
|                           |         | 1138                              | 645.37              | a-in-plane-rd + r-vCH + δCNC          | 0.04        |
|                           |         | 1137                              | 645.51              | a-in-plane-rd + r-vCH + δCNC          | 0.02        |
|                           |         | 1136                              | 646.11              | a-in-plane-rd + r-vCH + δCNC          | 0.00        |

Table S2

| Peaks (cm <sup>-1</sup> ) |         | Mode                                        | v <sub>n</sub>      | Description                                  | IR activity |
|---------------------------|---------|---------------------------------------------|---------------------|----------------------------------------------|-------------|
| (exp.)                    | (calc.) |                                             | (cm <sup>-1</sup> ) |                                              | (%)         |
|                           |         | 1135                                        | 646.62              | a-in-plane-rd + r-vCH + δCNC + δCCN          | 1.18        |
|                           |         | 1134                                        | 646.74              | a-in-plane-rd + r-vCH + vCC + δCNC           | 0.03        |
|                           |         | 1133                                        | 647.50              | a-in-plane-rd + r-vCH + δCNC + δCCN          | 0.08        |
|                           |         | 1132                                        | 647.87              | a-in-plane-rd + r-vCH                        | 0.36        |
|                           |         | 1131                                        | 648.39              | a-in-plane-rd + r-vCH + δCNC + δCCN          | 0.18        |
|                           |         | 1130                                        | 648.48              | a-in-plane-rd + r-vCH + δCNC + δCCN          | 0.00        |
|                           |         | 1129                                        | 649.05              | a-in-plane-rd + r-vCH + δCNC + δCCN          | 0.00        |
| 669                       | 666     | 1128                                        | 665.21              | s-out-of-plane-rd + δCNC + δCCN + vCN        | 4.09        |
|                           |         | 1127                                        | 665.64              | s-out-of-plane-rd + δCNC + δCCN + vCN        | 0.02        |
|                           |         | 1126                                        | 665.90              | s-out-of-plane-rd + δCNC + δCCN + vCN        | 0.00        |
|                           |         | 1125                                        | 666.72              | s-out-of-plane-rd + δCNC + δCCN + vCN        | 0.00        |
|                           |         | 1124                                        | 666.84              | s-out-of-plane-rd + δCNC + δCCN + vCN        | 0.05        |
|                           |         | 1123                                        | 666.86              | s-out-of-plane-rd + δCNC + δCCN + vCN        | 0.19        |
|                           |         | 1122                                        | 667.09              | s-out-of-plane-rd + δCNC + δCCN + vCN        | 0.00        |
|                           |         | 1121                                        | 667.83              | s-out-of-plane-rd + δCNC + δCCN + vCN        | 1.36        |
|                           |         | 1120                                        | 668.28              | s-out-of-plane-rd + δCNC + δCCN + vCN        | 0.07        |
|                           |         | 1119                                        | 669.87              | s-out-of-plane-rd + δCNC + δCCN + vCN + vCC  | 0.00        |
|                           |         | 1118                                        | 670.26              | s-out-of-plane-rd + δCNC + δCCN + vCN + vCC  | 0.00        |
|                           |         | 1117                                        | 670.39              | s-out-of-plane-rd + δCNC + δCCN + vCN + vCC  | 0.07        |
|                           |         | 1116                                        | 670.95              | s-out-of-plane-rd + δCNC + δCCN + vCN + vCC  | 0.00        |
|                           |         | 1115                                        | 671.42              | s-out-of-plane-rd + δCNC + δCCN + πCCNH      | 0.00        |
| 1114                      | 671.74  | s-out-of-plane-rd + δCNC + δCCN + πCCNH     | 0.01                |                                              |             |
| 1113                      | 671.93  | s-out-of-plane-rd + δCNC + δCCN + πCCNH     | 0.30                |                                              |             |
| 690                       | 682     | 1112                                        | 681.32              | s-out-of-plane-rd + δCNC + δCCN + πCCNH      | 0.03        |
|                           |         | 1111                                        | 681.85              | s-out-of-plane-rd + δCNC + δCCN + vCN + vCC  | 7.34        |
|                           |         | 1110                                        | 682.78              | s-out-of-plane-rd + δCNC + δCCN + vCN + vCC  | 4.40        |
|                           |         | 1109                                        | 683.34              | s-out-of-plane-rd + δCNC + δCCN + vCN + vCC  | 0.07        |
|                           |         | 1108                                        | 683.75              | s-out-of-plane-rd + δCNC + δCCN + vCN + vCC  | 0.00        |
|                           |         | 1107                                        | 684.19              | s-out-of-plane-rd + δCNC + δCCN + vCN + vCC  | 0.01        |
|                           |         | 1106                                        | 685.03              | s-out-of-plane-rd + δCNC + δCCN + vCN + vCC  | 0.00        |
|                           |         | 1105                                        | 685.35              | s-out-of-plane-rd + δCNC + δCCN + vCN + vCC  | 0.01        |
| 1104                      | 686.28  | s-out-of-plane-rd + δCNC + δCCN + vCN + vCC | 0.00                |                                              |             |
| 1103                      | 686.42  | s-in-plane-rd + δCNC + δCCN + vCN + vCC     | 0.13                |                                              |             |
| 705                       | 688     | 1102                                        | 686.78              | s-in-plane-rd + δCNC + δCCN + vCC + vCN      | 0.00        |
|                           |         | 1101                                        | 687.92              | πCCNH + s-out-of-plane-rd + δCNC + vCN       | 0.00        |
|                           |         | 1100                                        | 688.56              | s-in-plane-rd + πCCNH + δCNC + vCC + vCN     | 2.65        |
|                           |         | 1099                                        | 688.58              | s-in-plane-rd + πCCNH + δCNC + vCC + vCN     | 3.38        |
|                           |         | 1098                                        | 689.23              | s-in-plane-rd + πCCNH + δCCN + vCC + vCN     | 4.56        |
|                           |         | 1097                                        | 690.72              | πCCNH + s-in-plane-rd + δCCN + vCC + vCN     | 0.00        |
|                           |         | 1096                                        | 693.12              | s-in-plane-rd + δCNC + δCCN + vCC + vCN      | 0.25        |
|                           |         | 1095                                        | 693.67              | s-out-of-plane-rd + δCCN + δCNC + vCC + vCN  | 0.98        |
|                           |         | 1094                                        | 693.85              | s-in-plane-rd + δCCN + δCNC + vCC + vCN      | 0.19        |
|                           |         | 1093                                        | 694.63              | s-in-plane-rd + δCCN + δCNC + vCC + vCN      | 0.06        |
|                           |         | 1092                                        | 695.25              | s-in-plane-rd + δCCN + δCNC + vCC + vCN      | 0.66        |
|                           |         | 1091                                        | 695.64              | s-in-plane-rd + δCCN + δCNC + vCC + vCN      | 0.03        |
| 1090                      | 696.90  | s-in-plane-rd + δCCN + vCC + vCN + πCCNH    | 0.00                |                                              |             |
| 1089                      | 697.18  | πCCNH + δCCN + vCC + vCN + s-in-plane-rd    | 0.00                |                                              |             |
| 725                       | 700     | 1088                                        | 699.51              | πCCNH + δCCN + vCC + vCN + s-out-of-plane-rd | 1.20        |
|                           |         | 1087                                        | 699.86              | πCCNH + vCC + vCN + δCCN + s-out-of-plane-rd | 0.14        |
|                           |         | 1086                                        | 700.30              | πCCNH + vCC + vCN + δCCN + s-out-of-plane-rd | 0.07        |
|                           |         | 1085                                        | 700.42              | πCCNH + vCC + vCN + δCCN + s-out-of-plane-rd | 2.95        |

Table S2

| Peaks (cm <sup>-1</sup> ) |         | Mode                                                  | v <sub>n</sub>      | Description                                               | IR activity |
|---------------------------|---------|-------------------------------------------------------|---------------------|-----------------------------------------------------------|-------------|
| (exp.)                    | (calc.) |                                                       | (cm <sup>-1</sup> ) |                                                           | (%)         |
|                           |         | 1084                                                  | 700.60              | $\pi$ CCNH + vCC + vCN + $\delta$ CCN + s-out-of-plane-rd | 0.00        |
|                           |         | 1083                                                  | 701.01              | $\pi$ CCNH + vCC + vCN + $\delta$ CCN + s-out-of-plane-rd | 0.12        |
| 732                       | 705     | 1082                                                  | 702.31              | $\pi$ CCNH + vCC + vCN + $\delta$ CCN                     | 0.00        |
|                           |         | 1081                                                  | 703.35              | $\pi$ CCNH + vCC + vCN + $\delta$ CCN + s-out-of-plane-rd | 0.81        |
|                           |         | 1080                                                  | 703.85              | $\pi$ CCNH + vCC + vCN + $\delta$ CCN                     | 0.00        |
|                           |         | 1079                                                  | 704.22              | $\pi$ CCNH + vCC + vCN + $\delta$ CCN + s-out-of-plane-rd | 0.01        |
|                           |         | 1078                                                  | 705.04              | $\pi$ CCNH + vCC + vCN + $\delta$ CCN + s-out-of-plane-rd | 2.00        |
|                           |         | 1077                                                  | 705.15              | $\pi$ CCNH + vCC + vCN + $\delta$ CCN + s-out-of-plane-rd | 4.57        |
| 769                       | 762     | 1038                                                  | 762.20              | $\delta$ CCN + $\delta$ CNC + vCC + vCN                   | 0.14        |
|                           |         | 1037                                                  | 762.63              | $\delta$ CCN + $\delta$ CNC + vCC + s-out-of-plane-rd     | 0.33        |
|                           |         | 1036                                                  | 763.48              | $\delta$ CCN + $\delta$ CNC + vCC + s-out-of-plane-rd     | 0.00        |
|                           |         | 1035                                                  | 763.71              | $\delta$ CCN + vCN + s-out-of-plane-rd                    | 0.10        |
|                           |         | 1034                                                  | 764.06              | $\delta$ CCN + $\delta$ CNC + s-out-of-plane-rd           | 0.00        |
|                           |         | 1033                                                  | 764.30              | $\delta$ CCN + $\delta$ CNC + vCC + s-out-of-plane-rd     | 0.00        |
|                           |         | 1032                                                  | 766.27              | $\delta$ CCN + $\delta$ CNC + s-out-of-plane-rd           | 0.15        |
| 778                       | 770     | 1031                                                  | 767.03              | $\delta$ CCN + $\delta$ CNC + vCC + s-out-of-plane-rd     | 0.15        |
|                           |         | 1030                                                  | 768.36              | $\delta$ CCN + $\delta$ CNC + vCC + s-out-of-plane-rd     | 0.00        |
|                           |         | 1029                                                  | 768.44              | vCC + $\delta$ CCN + $\delta$ CNC + s-out-of-plane-rd     | 0.00        |
|                           |         | 1028                                                  | 768.61              | $\delta$ CCN + $\delta$ CNC + vCC + s-out-of-plane-rd     | 0.00        |
|                           |         | 1027                                                  | 769.22              | vCC + $\delta$ CCN + $\delta$ CNC + s-out-of-plane-rd     | 0.02        |
|                           |         | 1026                                                  | 769.58              | vCC + $\delta$ CCN + $\delta$ CNC + s-out-of-plane-rd     | 0.00        |
|                           |         | 1025                                                  | 769.88              | $\delta$ CCN + $\delta$ CNC + vCC + a-out-of-plane-rd     | 1.57        |
|                           |         | 1024                                                  | 770.24              | $\delta$ CCN + $\delta$ CNC + vCC + a-out-of-plane-rd     | 0.00        |
|                           |         | 1023                                                  | 770.43              | $\delta$ CCN + $\delta$ CNC + vCC + a-out-of-plane-rd     | 0.14        |
|                           |         | 1022                                                  | 770.49              | s-out-of-plane-rd + vCC + $\delta$ CCN + $\delta$ CNC     | 0.17        |
|                           |         | 1021                                                  | 770.56              | s-out-of-plane-rd + $\delta$ CCN + vCC + $\delta$ CNC     | 3.50        |
|                           |         | 1020                                                  | 772.25              | s-out-of-plane-rd + $\delta$ CCN + vCC + $\delta$ CNC     | 0.62        |
|                           |         | 1019                                                  | 772.48              | s-out-of-plane-rd + $\delta$ CCN + vCC                    | 0.01        |
|                           |         | 1018                                                  | 772.63              | s-out-of-plane-rd + $\delta$ CCN + vCC + $\delta$ CNC     | 0.14        |
| 1017                      | 773.46  | s-out-of-plane-rd + $\delta$ CCN + vCC + $\delta$ CNC | 0.00                |                                                           |             |
| 785                       | 783     | 1016                                                  | 782.90              | s-out-of-plane-rd + $\delta$ CCN + vCC + $\delta$ CNC     | 0.02        |
|                           |         | 1015                                                  | 783.23              | s-out-of-plane-rd + $\delta$ CCN + vCC + $\delta$ CNC     | 3.33        |
|                           |         | 1014                                                  | 783.35              | s-out-of-plane-rd + $\delta$ CCN + vCC + $\delta$ CNC     | 0.08        |
|                           |         | 1013                                                  | 783.52              | s-out-of-plane-rd + $\delta$ CCN + vCC + $\delta$ CNC     | 0.11        |
|                           |         | 1012                                                  | 783.79              | s-out-of-plane-rd + $\delta$ CCN + vCC + $\delta$ CNC     | 0.08        |
|                           |         | 1011                                                  | 784.06              | s-in-plane-rd + $\delta$ CCN + vCC + $\delta$ CNC         | 0.56        |
|                           |         | 1010                                                  | 784.48              | s-in-plane-rd + $\delta$ CCN + vCC + $\delta$ CNC         | 0.06        |
| 801                       | 808     | 1000                                                  | 806.73              | s-out-of-plane-rd + $\delta$ CCN + vCN                    | 0.32        |
|                           |         | 999                                                   | 807.21              | s-out-of-plane-rd + $\delta$ CCN + vCN                    | 0.79        |
|                           |         | 998                                                   | 807.46              | s-out-of-plane-rd + $\delta$ CCN + vCN                    | 0.01        |
|                           |         | 997                                                   | 807.81              | s-out-of-plane-rd + $\delta$ CCN + vCN                    | 0.00        |
|                           |         | 996                                                   | 808.38              | s-out-of-plane-rd + $\delta$ CCN + vCN                    | 0.35        |
|                           |         | 995                                                   | 808.99              | s-out-of-plane-rd + $\delta$ CCN + vCN                    | 1.18        |
|                           |         | 994                                                   | 809.23              | a-out-of-plane-rd + $\delta$ CCN + vCC                    | 0.02        |
|                           |         | 993                                                   | 809.73              | s-in-plane-rd + $\delta$ CCN + vCC                        | 0.00        |
| 813                       | 813     | 992                                                   | 813.57              | s-in-plane-rd + $\delta$ CCN + vCC                        | 1.06        |
|                           |         | 991                                                   | 813.73              | s-in-plane-rd + $\delta$ CCN + vCC                        | 0.06        |
|                           |         | 990                                                   | 813.89              | s-in-plane-rd + $\delta$ CCN + vCC                        | 0.00        |
|                           |         | 989                                                   | 814.38              | s-in-plane-rd + $\delta$ CCN + vCC                        | 0.48        |
|                           |         | 988                                                   | 814.46              | s-in-plane-rd + $\delta$ CCN + vCC                        | 0.20        |
|                           |         | 987                                                   | 814.66              | s-in-plane-rd + $\delta$ CCN + vCC                        | 0.03        |



Table S2

| Peaks (cm <sup>-1</sup> ) |         | Mode                           | v <sub>n</sub>      | Description                            | IR activity |
|---------------------------|---------|--------------------------------|---------------------|----------------------------------------|-------------|
| (exp.)                    | (calc.) |                                | (cm <sup>-1</sup> ) |                                        | (%)         |
|                           |         | 986                            | 814.89              | s-in-plane-rd + δCCN + vCC             | 0.02        |
|                           |         | 985                            | 815.06              | s-in-plane-rd + δCCN + vCC             | 0.00        |
| 822                       | 821     | 984                            | 818.63              | s-out-of-plane-rd + δCCN + vCC         | 0.00        |
|                           |         | 983                            | 818.76              | s-out-of-plane-rd + δCCN + vCC         | 0.00        |
|                           |         | 982                            | 819.83              | s-out-of-plane-rd + δCCN + vCC         | 0.06        |
|                           |         | 981                            | 819.90              | s-out-of-plane-rd + δCCN + vCC + r-vCH | 0.05        |
|                           |         | 980                            | 820.41              | s-out-of-plane-rd + δCCN + vCC + r-vCH | 0.12        |
|                           |         | 979                            | 820.57              | s-out-of-plane-rd + δCCN + vCC         | 1.28        |
|                           |         | 978                            | 821.70              | s-out-of-plane-rd + vCC                | 0.51        |
|                           |         | 977                            | 822.08              | s-out-of-plane-rd + δCCN + vCC + r-vCH | 1.06        |
|                           |         | 976                            | 824.93              | s-out-of-plane-rd + δCCN + vCC         | 0.04        |
|                           |         | 975                            | 825.33              | s-out-of-plane-rd + δCCN + vCC         | 0.64        |
|                           |         | 974                            | 826.18              | s-out-of-plane-rd + δCCN + vCC         | 0.04        |
|                           |         | 973                            | 826.57              | s-out-of-plane-rd + δCCN + vCC         | 0.30        |
|                           |         | 972                            | 828.61              | s-out-of-plane-rd + δCCN + vCC         | 0.00        |
|                           |         | 971                            | 829.19              | s-out-of-plane-rd + δCCN + vCC         | 0.00        |
|                           |         | 970                            | 830.26              | s-out-of-plane-rd + δCCN + vCC         | 0.00        |
| 969                       | 830.57  | s-out-of-plane-rd + δCCN + vCC | 0.00                |                                        |             |
| 857                       | 861     | 944                            | 856.90              | s-out-of-plane-rd + δCCN + vCN + vCC   | 0.11        |
|                           |         | 943                            | 856.97              | s-out-of-plane-rd + δCCN + vCN + vCC   | 0.05        |
|                           |         | 942                            | 857.10              | s-out-of-plane-rd + δCCN + vCN + vCC   | 0.09        |
|                           |         | 941                            | 857.11              | s-out-of-plane-rd + δCCN + vCN + vCC   | 0.11        |
|                           |         | 940                            | 857.69              | s-out-of-plane-rd + δCCN + vCN + vCC   | 0.13        |
|                           |         | 939                            | 857.79              | s-out-of-plane-rd + δCCN + vCN + vCC   | 0.17        |
|                           |         | 938                            | 858.00              | s-out-of-plane-rd + δCCN + vCN         | 0.05        |
|                           |         | 937                            | 858.13              | s-out-of-plane-rd + δCCN + vCN + vCC   | 0.04        |
|                           |         | 936                            | 861.22              | s-out-of-plane-rd + δCCN + vCN         | 1.92        |
|                           |         | 935                            | 861.81              | s-out-of-plane-rd + δCCN + vCN         | 0.01        |
|                           |         | 934                            | 862.06              | s-out-of-plane-rd + δCCN               | 0.03        |
|                           |         | 933                            | 862.28              | s-out-of-plane-rd + δCCN               | 0.00        |
|                           |         | 932                            | 862.38              | s-out-of-plane-rd + δCCN               | 0.97        |
|                           |         | 931                            | 862.99              | s-out-of-plane-rd + δCCN               | 0.00        |
|                           |         | 930                            | 863.37              | s-out-of-plane-rd + δCCN               | 0.32        |
| 929                       | 863.79  | s-out-of-plane-rd + δCNC       | 0.00                |                                        |             |
| **                        | **      | 921                            | 874.49              | s-in-plane-rd + πCNC + δHCH            | 0.00        |
| 887                       | 882     | 920                            | 882.02              | a-out-of-plane-rd + δCCN               | 0.01        |
|                           |         | 919                            | 882.04              | a-out-of-plane-rd + δCCN               | 0.02        |
|                           |         | 918                            | 882.04              | a-out-of-plane-rd + δCCN               | 0.12        |
|                           |         | 917                            | 882.13              | a-out-of-plane-rd + δCCN               | 0.02        |
| 903                       | 895     | 916                            | 894.09              | a-out-of-plane-rd + δCCN               | 0.03        |
|                           |         | 915                            | 894.19              | a-out-of-plane-rd + δCCN               | 0.48        |
|                           |         | 914                            | 894.22              | a-out-of-plane-rd + δCCN               | 0.18        |
|                           |         | 913                            | 894.33              | a-out-of-plane-rd + δCCN               | 0.09        |
|                           |         | 912                            | 895.42              | a-out-of-plane-rd + δCCN               | 0.22        |
|                           |         | 911                            | 895.55              | a-out-of-plane-rd + δCCN               | 0.38        |
|                           |         | 910                            | 895.59              | a-out-of-plane-rd + δCCN + r-vCH       | 0.19        |
|                           |         | 909                            | 895.81              | a-out-of-plane-rd                      | 0.01        |
|                           |         | 908                            | 896.31              | a-out-of-plane-rd + δCCN               | 0.01        |
|                           |         | 907                            | 896.33              | a-out-of-plane-rd + δCCN               | 0.01        |
|                           |         | 906                            | 896.46              | a-out-of-plane-rd + δCCN               | 0.61        |
| 905                       | 896.47  | a-out-of-plane-rd + δCCN       | 0.18                |                                        |             |

Table S2

| Peaks (cm <sup>-1</sup> ) |         | Mode                            | v <sub>n</sub>      | Description                      | IR activity |
|---------------------------|---------|---------------------------------|---------------------|----------------------------------|-------------|
| (exp.)                    | (calc.) |                                 | (cm <sup>-1</sup> ) |                                  | (%)         |
| 912                       | 917     | 904                             | 916.96              | s-in-plane-rd + δCCN + vCC       | 0.01        |
|                           |         | 903                             | 917.11              | a-out-of-plane-rd + δCCN         | 0.19        |
|                           |         | 902                             | 917.50              | a-out-of-plane-rd + δCCN         | 0.18        |
|                           |         | 901                             | 917.67              | a-out-of-plane-rd + δCCN         | 0.08        |
|                           |         | 900                             | 917.86              | s-in-plane-rb + δCNC             | 0.12        |
|                           |         | 899                             | 918.12              | s-in-plane-rb                    | 0.01        |
|                           |         | 898                             | 918.34              | s-in-plane-rb                    | 0.04        |
|                           |         | 897                             | 918.71              | a-out-of-plane-rd                | 0.01        |
| 923                       | 922     | 896                             | 920.25              | a-out-of-plane-rd + δCCN         | 0.03        |
|                           |         | 895                             | 920.78              | a-out-of-plane-rd + δCCN         | 0.00        |
|                           |         | 894                             | 920.92              | a-out-of-plane-rd + δCCN + r-vCH | 0.14        |
|                           |         | 893                             | 921.26              | a-out-of-plane-rd + δCCN + r-vCH | 0.00        |
|                           |         | 892                             | 922.11              | a-out-of-plane-rd + δCCN         | 0.05        |
|                           |         | 891                             | 922.51              | a-out-of-plane-rd + δCNC + r-vCH | 0.00        |
|                           |         | 890                             | 922.76              | a-out-of-plane-rd + δCNC         | 0.18        |
|                           |         | 889                             | 923.08              | s-out-of-plane-rd + δCNC         | 0.00        |
| 938                       | 938     | 888                             | 938.00              | s-out-of-plane-rd + δCNC         | 0.10        |
|                           |         | 887                             | 938.21              | s-out-of-plane-rd + δCNC         | 0.08        |
|                           |         | 886                             | 939.39              | s-out-of-plane-rd + δCNC         | 0.03        |
|                           |         | 885                             | 940.44              | s-out-of-plane-rd + δCNC         | 0.00        |
|                           |         | 884                             | 942.21              | s-out-of-plane-rd + δCNC         | 0.00        |
|                           |         | 883                             | 942.35              | s-out-of-plane-rd + δCNC         | 0.00        |
|                           |         | 882                             | 943.34              | s-out-of-plane-rd + δCNC         | 0.00        |
|                           |         | 881                             | 943.97              | s-out-of-plane-rd + δCNC         | 0.00        |
| 946                       | 945     | 880                             | 945.86              | s-out-of-plane-rd + δCNC         | 0.07        |
|                           |         | 879                             | 946.43              | s-out-of-plane-rd + δCNC         | 0.65        |
|                           |         | 878                             | 947.04              | s-out-of-plane-rd + δCNC         | 0.05        |
|                           |         | 877                             | 947.24              | s-out-of-plane-rd + δCCN + δCNC  | 0.00        |
|                           |         | 876                             | 947.44              | s-out-of-plane-rd + δCCN + δCNC  | 0.01        |
|                           |         | 875                             | 947.60              | s-out-of-plane-rd + δCCN + δCNC  | 0.12        |
|                           |         | 874                             | 948.25              | s-out-of-plane-rd + δCCN + δCNC  | 0.00        |
|                           |         | 873                             | 948.99              | s-out-of-plane-rd + δCCN + δCNC  | 0.00        |
| 963                       | 954     | 872                             | 951.94              | s-out-of-plane-rd + δCCN + δCNC  | 0.03        |
|                           |         | 871                             | 952.27              | s-out-of-plane-rd + δCCN + δCNC  | 0.02        |
|                           |         | 870                             | 952.38              | s-out-of-plane-rd + δCCN + δCNC  | 0.01        |
|                           |         | 869                             | 952.97              | s-out-of-plane-rd + δCCN + δCNC  | 0.00        |
|                           |         | 868                             | 953.04              | s-out-of-plane-rd + δCCN + δCNC  | 0.01        |
|                           |         | 867                             | 953.58              | s-out-of-plane-rd + δCCN + δCNC  | 0.02        |
|                           |         | 866                             | 953.69              | s-out-of-plane-rd + δCCN + δCNC  | 0.05        |
|                           |         | 865                             | 953.82              | a-out-of-plane-rd + δCCN + δCNC  | 0.01        |
|                           |         | 864                             | 954.40              | a-out-of-plane-rd + δCCN + δCNC  | 0.57        |
|                           |         | 863                             | 954.51              | a-out-of-plane-rd + δCCN + δCNC  | 0.31        |
|                           |         | 862                             | 954.89              | a-out-of-plane-rd + δCNC         | 0.02        |
|                           |         | 861                             | 955.30              | a-out-of-plane-rd + δCCN + δCNC  | 0.00        |
|                           |         | 860                             | 957.13              | a-out-of-plane-rd + δCCN + δCNC  | 0.00        |
|                           |         | 859                             | 957.31              | a-out-of-plane-rd + δCCN + δCNC  | 0.00        |
| 858                       | 957.80  | a-out-of-plane-rd + δCCN + δCNC | 0.00                |                                  |             |
| 857                       | 958.60  | a-out-of-plane-rd + δCCN + δCNC | 0.00                |                                  |             |
| 971                       | 965     | 856                             | 962.46              | a-out-of-plane-rd + δCCN + δCNC  | 0.00        |
|                           |         | 855                             | 962.51              | a-out-of-plane-rd                | 0.01        |
|                           |         | 854                             | 963.70              | a-out-of-plane-rd                | 0.01        |

Table S2

| Peaks (cm <sup>-1</sup> ) |         | Mode                            | v <sub>n</sub>      | Description                        | IR activity |
|---------------------------|---------|---------------------------------|---------------------|------------------------------------|-------------|
| (exp.)                    | (calc.) |                                 | (cm <sup>-1</sup> ) |                                    | (%)         |
|                           |         | 853                             | 964.31              | a-out-of-plane-rd + δCCN + δCNC    | 0.00        |
|                           |         | 852                             | 965.13              | a-out-of-plane-rd + δCCN + δCNC    | 0.06        |
|                           |         | 851                             | 965.29              | a-out-of-plane-rd + δCCN + δCNC    | 0.02        |
|                           |         | 850                             | 965.37              | a-out-of-plane-rd + δCCN           | 0.09        |
|                           |         | 849                             | 965.62              | a-out-of-plane-rd + δCNC           | 0.12        |
|                           |         | 848                             | 965.87              | a-out-of-plane-rd + δCNC           | 0.15        |
|                           |         | 847                             | 966.09              | a-out-of-plane-rd                  | 0.01        |
|                           |         | 846                             | 966.20              | a-out-of-plane-rd                  | 0.02        |
|                           |         | 845                             | 966.48              | a-out-of-plane-rd                  | 0.01        |
|                           |         | 844                             | 967.07              | a-out-of-plane-rd                  | 0.00        |
|                           |         | 843                             | 967.15              | a-out-of-plane-rd                  | 0.00        |
|                           |         | 842                             | 967.36              | a-out-of-plane-rd                  | 0.03        |
|                           |         | 841                             | 968.09              | a-out-of-plane-rd                  | 0.00        |
| 978                       | 974     | 840                             | 972.67              | a-out-of-plane-rd                  | 0.01        |
|                           |         | 839                             | 973.03              | a-out-of-plane-rd                  | 0.21        |
|                           |         | 838                             | 973.81              | a-out-of-plane-rd                  | 0.00        |
|                           |         | 837                             | 973.86              | a-out-of-plane-rd                  | 0.00        |
|                           |         | 836                             | 974.97              | a-out-of-plane-rd                  | 0.09        |
|                           |         | 835                             | 975.18              | a-out-of-plane-rd                  | 0.00        |
|                           |         | 834                             | 975.60              | a-out-of-plane-rd                  | 0.00        |
|                           |         | 833                             | 975.81              | a-out-of-plane-rd                  | 0.00        |
|                           |         | 832                             | 978.75              | a-out-of-plane-rd                  | 0.00        |
|                           |         | 831                             | 979.06              | a-out-of-plane-rd                  | 0.04        |
|                           |         | 830                             | 979.20              | a-out-of-plane-rd                  | 0.00        |
|                           |         | 829                             | 979.45              | a-out-of-plane-rd                  | 0.04        |
|                           |         | 828                             | 980.30              | a-out-of-plane-rd + r-vCH          | 0.00        |
|                           |         | 827                             | 980.61              | a-out-of-plane-rd + r-vCH          | 0.07        |
| 826                       | 980.85  | a-out-of-plane-rd + δCCN + δCNC | 0.00                |                                    |             |
| 825                       | 981.08  | a-out-of-plane-rd + δCCN + δCNC | 0.08                |                                    |             |
| 993                       | 984     | 824                             | 984.18              | a-out-of-plane-rd + δCCN + δCNC    | 0.00        |
|                           |         | 823                             | 985.07              | s-out-of-plane-rd + δCCN + δCNC    | 2.28        |
|                           |         | 822                             | 985.57              | a-out-of-plane-rd + δCCN + δCNC    | 0.03        |
|                           |         | 821                             | 985.70              | a-out-of-plane-rd + δCCN + δCNC    | 0.02        |
|                           |         | 820                             | 986.19              | a-out-of-plane-rd + δCCN + δCNC    | 0.00        |
|                           |         | 819                             | 986.39              | a-out-of-plane-rd + δCCN + δCNC    | 0.00        |
|                           |         | 818                             | 986.92              | a-out-of-plane-rd + δCCN + δCNC    | 0.01        |
|                           |         | 817                             | 987.43              | a-out-of-plane-rd + δCCN + δCNC    | 0.00        |
| 1000                      | 990     | 816                             | 989.83              | a-out-of-plane-rd + δCCN + δCNC    | 0.00        |
|                           |         | 815                             | 990.24              | a-out-of-plane-rd + δCCN + δCNC    | 0.00        |
|                           |         | 814                             | 990.56              | a-out-of-plane-rd + δCCN + δCNC    | 0.00        |
|                           |         | 813                             | 990.65              | a-out-of-plane-rd + δCCN + δCNC    | 0.01        |
|                           |         | 812                             | 991.12              | a-out-of-plane-rd + δCCN + δCNC    | 0.17        |
|                           |         | 811                             | 991.29              | a-out-of-plane-rd + δCCN + δCNC    | 0.12        |
|                           |         | 810                             | 991.67              | a-out-of-plane-rd + δCCN + δCNC    | 0.01        |
|                           |         | 809                             | 992.21              | s-in-plane-rd                      | 0.47        |
| **                        | **      | 792                             | 1000.04             | s-in-plane-rd + s-r-vCH            | 0.01        |
|                           |         | 789                             | 1000.75             | s-in-plane-rd + s-r-vCH            | 0.00        |
|                           |         | 788                             | 1003.76             | s-in-plane-rd + s-r-vCH            | 0.03        |
|                           |         | 786                             | 1004.00             | s-in-plane-rd + s-r-vCH            | 0.01        |
|                           |         | 785                             | 1004.01             | s-in-plane-rd + s-r-vCH            | 0.01        |
| 1021                      | 1022    | 784                             | 1019.41             | s-in-plane-rd + r-vCH + vCC + δCNC | 0.00        |

Table S2

| Peaks (cm <sup>-1</sup> ) |         | Mode                             | v <sub>n</sub>      | Description                                 | IR activity |
|---------------------------|---------|----------------------------------|---------------------|---------------------------------------------|-------------|
| (exp.)                    | (calc.) |                                  | (cm <sup>-1</sup> ) |                                             | (%)         |
|                           |         | 783                              | 1019.49             | s-in-plane-rd + vCC + δCNC                  | 0.00        |
|                           |         | 782                              | 1019.70             | s-in-plane-rd + r-vCH + vCC                 | 0.01        |
|                           |         | 781                              | 1019.76             | s-in-plane-rd + r-vCH + vCC + δCNC          | 0.01        |
|                           |         | 780                              | 1020.18             | s-in-plane-rd + r-vCH + vCC + δCNC          | 0.04        |
|                           |         | 779                              | 1020.19             | s-in-plane-rd + r-vCH + vCC + δCNC          | 0.00        |
|                           |         | 778                              | 1020.66             | s-in-plane-rd + r-vCH + vCC + δCNC          | 0.06        |
|                           |         | 777                              | 1020.74             | s-in-plane-rd + r-vCH + vCC                 | 0.01        |
|                           |         | 776                              | 1021.14             | s-in-plane-rd + r-vCH + vCC                 | 0.60        |
|                           |         | 775                              | 1021.30             | s-in-plane-rd + r-vCH + vCC + δCNC          | 0.02        |
|                           |         | 774                              | 1021.61             | s-in-plane-rd + r-vCH + vCC                 | 0.01        |
|                           |         | 773                              | 1021.89             | s-in-plane-rd + vCC                         | 0.57        |
|                           |         | 772                              | 1024.04             | s-in-plane-rd                               | 0.02        |
|                           |         | 771                              | 1024.24             | s-in-plane-rd + r-vCH                       | 0.35        |
|                           |         | 770                              | 1024.32             | s-in-plane-rd + vCC                         | 0.09        |
|                           |         | 769                              | 1024.49             | s-in-plane-rd + vCC                         | 0.49        |
| 1025                      | 1028    | 768                              | 1027.04             | vCN + δCNC + δCCN + vNC + a-in-plane-rd     | 0.01        |
|                           |         | 767                              | 1027.13             | vCN + δCNC + δCCN + vNC + a-in-plane-rd     | 0.11        |
|                           |         | 766                              | 1027.83             | vCN + δCNC + δCCN + vNC + a-in-plane-rd     | 0.01        |
|                           |         | 765                              | 1028.02             | vCN + δCNC + δCCN + vNC + a-in-plane-rd     | 0.03        |
|                           |         | 764                              | 1028.64             | vCN + δCNC + δCCN + vNC + a-in-plane-rd     | 0.13        |
|                           |         | 763                              | 1029.08             | vCN + δCNC + δCCN + vNC + a-in-plane-rd     | 0.75        |
|                           |         | 762                              | 1029.22             | vCN + δCNC + δCCN + vNC + a-in-plane-rd     | 0.17        |
|                           |         | 761                              | 1029.61             | vCN + δCNC + δCCN + vNC + a-in-plane-rd     | 0.19        |
| 1042                      | 1046    | 760                              | 1044.11             | δCNC + vCN + δCCN + vNC + s-out-of-plane-rd | 0.09        |
|                           |         | 759                              | 1044.45             | δCNC + vCN + δCCN + vNC                     | 0.06        |
|                           |         | 758                              | 1044.55             | δCNC + vCN + δCCN + s-in-plane-rd           | 0.00        |
|                           |         | 757                              | 1044.88             | δCNC + vCN + δCCN + s-in-plane-rd           | 0.01        |
|                           |         | 756                              | 1045.21             | δCNC + vCN + s-in-plane-rd                  | 0.00        |
|                           |         | 755                              | 1045.43             | vNC + δCNC + vCN + δCCN + δCCC              | 0.05        |
|                           |         | 754                              | 1045.59             | vNC + δCNC + δCCN + δCCC                    | 0.01        |
|                           |         | 753                              | 1045.71             | vNC + δCNC + vCC + a-in-plane-rd            | 0.21        |
|                           |         | 752                              | 1045.86             | vNC + δCNC + δCCN + a-in-plane-rd           | 0.05        |
|                           |         | 751                              | 1046.28             | vNC + δCNC + δCCN + a-in-plane-rd           | 0.09        |
|                           |         | 750                              | 1046.42             | vNC + δCNC + δCCN + a-in-plane-rd           | 0.06        |
|                           |         | 749                              | 1046.68             | vNC + δCNC + δCCN + a-in-plane-rd           | 0.07        |
|                           |         | 748                              | 1046.80             | vNC + δCNC + vCC + a-in-plane-rd            | 0.01        |
|                           |         | 747                              | 1047.05             | vNC + vCC + δCNC + a-in-plane-rd            | 0.01        |
|                           |         | 746                              | 1047.25             | vNC + vCN + δCNC + a-in-plane-rd            | 0.04        |
| 745                       | 1047.56 | vNC + vCN + δCNC + a-in-plane-rd | 0.01                |                                             |             |
| 1055                      | 1060    | 744                              | 1059.73             | vNC + vCN + δCNC + δCCN                     | 0.02        |
|                           |         | 743                              | 1059.80             | vCN + vNC + δCCN + a-in-plane-rd            | 0.32        |
|                           |         | 742                              | 1059.93             | vCN + δCCN + δCNC + vNC                     | 0.46        |
|                           |         | 741                              | 1060.12             | vCN + a-in-plane-rd + δCCN                  | 0.02        |
|                           |         | 740                              | 1061.66             | vCN + s-in-plane-rd + δCCC                  | 0.00        |
|                           |         | 739                              | 1061.76             | a-in-plane-rd + δCCC + vCN                  | 0.00        |
|                           |         | 738                              | 1061.81             | a-in-plane-rd + δCCC + δCCN                 | 0.00        |
|                           |         | 737                              | 1062.30             | a-in-plane-rd + δCCN + δCCC                 | 0.02        |
| 1083                      | 1092    | 736                              | 1089.14             | a-in-plane-rd + δCCC                        | 0.01        |
|                           |         | 735                              | 1089.43             | a-in-plane-rd + δCCC + δCCN                 | 0.00        |
|                           |         | 734                              | 1089.65             | a-in-plane-rd + δCCC + δCCN                 | 0.01        |
|                           |         | 733                              | 1089.79             | a-in-plane-rd + δCCC + δCCN                 | 0.00        |

Table S2

| Peaks (cm <sup>-1</sup> ) |         | Mode                            | v <sub>n</sub>      | Description                      | IR activity |
|---------------------------|---------|---------------------------------|---------------------|----------------------------------|-------------|
| (exp.)                    | (calc.) |                                 | (cm <sup>-1</sup> ) |                                  | (%)         |
|                           |         | 732                             | 1090.21             | a-in-plane-rd + δCCC + δCCN      | 0.09        |
|                           |         | 731                             | 1090.43             | a-in-plane-rd + δCCC + δCCN      | 0.00        |
|                           |         | 730                             | 1090.55             | a-in-plane-rd + δCCC + δCCN      | 0.06        |
|                           |         | 729                             | 1090.79             | a-in-plane-rd + δCCC + δCCN      | 0.00        |
|                           |         | 728                             | 1091.39             | a-in-plane-rd + δCCC + δCCN      | 0.64        |
|                           |         | 727                             | 1092.29             | a-in-plane-rd + δCCC + δCCN      | 1.29        |
|                           |         | 726                             | 1092.88             | a-in-plane-rd + δCCC + δCCN      | 1.98        |
|                           |         | 725                             | 1093.76             | a-in-plane-rd + δCCC + δCCN      | 0.14        |
|                           |         | 724                             | 1094.46             | a-in-plane-rd + δCCC + νCN       | 0.00        |
|                           |         | 723                             | 1095.00             | a-in-plane-rd + δCCC + δCCN      | 0.00        |
|                           |         | 722                             | 1095.47             | a-in-plane-rd + δCCC + νCN       | 0.00        |
|                           |         | 721                             | 1096.09             | a-in-plane-rd + δCCC + νCN       | 0.00        |
| 1109                      | 1118    | 720                             | 1118.27             | a-in-plane-rd + δCCC + δCCN      | 0.34        |
|                           |         | 719                             | 1118.69             | a-in-plane-rd + δCCC + δCCN      | 0.48        |
|                           |         | 718                             | 1118.85             | a-in-plane-rd + δCCC + δCCN      | 0.01        |
|                           |         | 717                             | 1119.33             | a-in-plane-rd + δCCC + δCCN      | 0.01        |
| 1114                      | 1123    | 716                             | 1121.98             | a-in-plane-rd + δCCC + δCCN      | 0.08        |
|                           |         | 715                             | 1122.11             | a-in-plane-rd + δCCC + δCCN      | 0.00        |
|                           |         | 714                             | 1122.63             | a-in-plane-rd + δCCC + νCN       | 0.01        |
|                           |         | 713                             | 1122.65             | a-in-plane-rd + δCCC + νCN       | 0.00        |
|                           |         | 712                             | 1123.81             | a-in-plane-rd + δCCC + νCN       | 0.16        |
|                           |         | 711                             | 1124.33             | a-in-plane-rd + δCCC + νCN       | 0.21        |
|                           |         | 710                             | 1124.48             | a-in-plane-rd + δCCC + δCCN      | 0.03        |
|                           |         | 709                             | 1124.87             | a-in-plane-rd + δCCC             | 0.00        |
|                           |         | 708                             | 1124.95             | a-in-plane-rd + δCCC             | 0.04        |
|                           |         | 707                             | 1125.34             | a-in-plane-rd + δCCC + νCN       | 0.00        |
|                           |         | 706                             | 1125.41             | νCN+ νCC + a-in-plane-rd + δCCC  | 0.04        |
| 705                       | 1125.72 | νCN+ νCC + a-in-plane-rd + δCCC | 0.00                |                                  |             |
| 1127                      | 1139    | 692                             | 1139.38             | s-in-plane-rd + νCC + νCN + δCCN | 0.00        |
|                           |         | 691                             | 1139.43             | νCC+ νCN + s-in-plane-rd + δCCN  | 0.07        |
|                           |         | 690                             | 1139.99             | s-in-plane-rd + νCC + νCN + δCCN | 0.17        |
|                           |         | 689                             | 1140.18             | s-in-plane-rd + νCC + νCN + δCCN | 0.07        |
| 1167                      | 1173    | 688                             | 1168.98             | s-in-plane-rd + νCC + νCN + δCCN | 0.01        |
|                           |         | 687                             | 1169.01             | s-in-plane-rd + νCN + νCC + δCCN | 0.01        |
|                           |         | 686                             | 1169.61             | s-in-plane-rd + νCN + νCC + δCCN | 0.00        |
|                           |         | 685                             | 1169.63             | s-in-plane-rd + νCN + νCC + δCCN | 0.00        |
|                           |         | 684                             | 1170.25             | s-in-plane-rd + νCN + νCC + δCCN | 0.00        |
|                           |         | 683                             | 1170.42             | s-in-plane-rd + νCN + νCC + δCCN | 0.05        |
|                           |         | 682                             | 1170.81             | νCN+ νCC + s-in-plane-rd + δCCN  | 0.00        |
|                           |         | 681                             | 1171.24             | νCN+ νCC + s-in-plane-rd + δCCN  | 0.00        |
|                           |         | 680                             | 1171.81             | νCN+ νCC + s-in-plane-rd + δCCN  | 0.52        |
|                           |         | 679                             | 1172.09             | s-in-plane-rd + νCN + νCC + δCCN | 0.70        |
|                           |         | 678                             | 1172.23             | νCC+ νCN + s-in-plane-rd + δCCN  | 0.04        |
|                           |         | 677                             | 1172.78             | νCC+ νCN + s-in-plane-rd + δCCN  | 0.00        |
|                           |         | 676                             | 1172.93             | νCC+ νCN + s-in-plane-rd + δCCN  | 0.00        |
|                           |         | 675                             | 1173.19             | s-in-plane-rd + νCC+ νCN + δCCN  | 0.05        |
|                           |         | 674                             | 1173.32             | s-in-plane-rd + νCC+ νCN + δCCN  | 0.07        |
|                           |         | 673                             | 1173.38             | s-in-plane-rd + νCC+ νCN + δCCN  | 0.01        |
|                           |         | 672                             | 1173.76             | s-in-plane-rd + νCC+ νCN + δCCN  | 0.14        |
|                           |         | 671                             | 1174.28             | s-in-plane-rd + νCC+ νCN + δCCN  | 0.19        |
| 670                       | 1174.57 | s-in-plane-rd + νCC+ νCN + δCCN | 0.00                |                                  |             |

Table S2

| Peaks (cm <sup>-1</sup> ) |         | Mode                             | v <sub>n</sub>      | Description                      | IR activity |
|---------------------------|---------|----------------------------------|---------------------|----------------------------------|-------------|
| (exp.)                    | (calc.) |                                  | (cm <sup>-1</sup> ) |                                  | (%)         |
|                           |         | 669                              | 1174.84             | s-in-plane-rd + vCC+ vCN + δCCN  | 0.00        |
|                           |         | 668                              | 1175.06             | s-in-plane-rd + vCC+ vCN + δCCN  | 0.25        |
|                           |         | 667                              | 1175.40             | s-in-plane-rd + vCC+ vCN + δCCN  | 0.00        |
|                           |         | 666                              | 1175.79             | vCN + vCC + s-in-plane-rd+ δCNC  | 0.66        |
|                           |         | 665                              | 1176.02             | s-in-plane-rd + vCC+ vCN + δCCN  | 0.13        |
| 1176                      | 1181    | 664                              | 1180.88             | s-in-plane-rd + vCC + vCN + δCNC | 0.00        |
|                           |         | 663                              | 1181.08             | s-in-plane-rd + vCC + vCN + δCNC | 0.00        |
|                           |         | 662                              | 1181.46             | s-in-plane-rd + vCC + vCN + δCNC | 0.04        |
|                           |         | 661                              | 1181.57             | s-in-plane-rd + vCC + vCN + δCNC | 0.05        |
|                           |         | 660                              | 1181.80             | s-in-plane-rd + vCC + vCN + δCNC | 0.00        |
|                           |         | 659                              | 1182.24             | s-in-plane-rd + vCC + vCN + δCNC | 0.00        |
|                           |         | 658                              | 1182.80             | s-in-plane-rd + vCC + vCN + δCNC | 0.00        |
|                           |         | 657                              | 1183.21             | s-in-plane-rd + vCC + vCN + δCNC | 0.00        |
|                           |         | 656                              | 1183.31             | s-in-plane-rd + vCC + vCN + δCNC | 0.05        |
|                           |         | 655                              | 1183.49             | s-in-plane-rd + vCC + vCN + δCNC | 0.02        |
| 654                       | 1183.59 | s-in-plane-rd + vCC + vCN + δCNC | 0.02                |                                  |             |
| 653                       | 1183.97 | s-in-plane-rd + vCC + vCN + δCNC | 0.13                |                                  |             |
| 1182                      | 1190    | 652                              | 1188.95             | s-in-plane-rd + vCC + vCN + δCNC | 0.07        |
|                           |         | 651                              | 1189.39             | s-in-plane-rd + vCC + vCN + δCNC | 0.00        |
|                           |         | 650                              | 1189.81             | s-in-plane-rd + vCC + vCN + δCNC | 0.08        |
|                           |         | 649                              | 1190.26             | s-in-plane-rd + vCC + vCN + δCNC | 0.01        |
|                           |         | 648                              | 1190.50             | s-in-plane-rd + vCC + vCN + δCNC | 0.01        |
|                           |         | 647                              | 1190.70             | s-in-plane-rd + vCC + vCN + δCNC | 0.00        |
|                           |         | 646                              | 1191.25             | s-in-plane-rd + vCC + vCN + δCNC | 0.03        |
|                           |         | 645                              | 1191.50             | s-in-plane-rd + vCC + vCN        | 0.00        |
|                           |         | 644                              | 1195.99             | s-in-plane-rd + vCC + vCN        | 0.00        |
|                           |         | 643                              | 1196.01             | s-in-plane-rd + vCC + vCN        | 0.00        |
|                           |         | 642                              | 1197.67             | s-in-plane-rd + vCC + vCN        | 0.00        |
| 641                       | 1197.91 | s-in-plane-rd + vCC + vCN + δCCN | 0.00                |                                  |             |
| 1198                      | 1206    | 640                              | 1203.16             | vCC + s-in-plane-rd + vCN + δCCN | 0.04        |
|                           |         | 639                              | 1203.51             | vCC + s-in-plane-rd + vCN + δCCN | 0.00        |
|                           |         | 638                              | 1203.69             | vCC + s-in-plane-rd + vCN + δCCN | 0.00        |
|                           |         | 637                              | 1203.80             | vCC + s-in-plane-rd + vCN + δCCN | 0.00        |
|                           |         | 636                              | 1204.56             | vCC + s-in-plane-rd + vCN + δCCN | 0.07        |
|                           |         | 635                              | 1204.80             | vCC + s-in-plane-rd + vCN + δCCN | 0.00        |
|                           |         | 634                              | 1205.04             | s-in-plane-rd + vCC+ δCCN + vCN  | 0.47        |
|                           |         | 633                              | 1205.11             | vCC + s-in-plane-rd + δCCN + vCN | 0.21        |
|                           |         | 632                              | 1206.12             | vCC + s-in-plane-rd + δCCN + vCN | 0.29        |
|                           |         | 631                              | 1206.28             | vCC + s-in-plane-rd + δCCN + vCN | 0.55        |
|                           |         | 630                              | 1206.37             | vCC + s-in-plane-rd + δCCN + vCN | 0.00        |
|                           |         | 629                              | 1206.66             | vCC + s-in-plane-rd + δCCN + vCN | 0.00        |
|                           |         | 628                              | 1206.84             | vCC + s-in-plane-rd + δCCN + vCN | 0.01        |
|                           |         | 627                              | 1206.86             | s-in-plane-rd + vCC+ δCCN + vCN  | 0.01        |
|                           |         | 626                              | 1207.12             | s-in-plane-rd + vCC + vCN+ δCCN  | 0.26        |
|                           |         | 625                              | 1207.19             | vCC + s-in-plane-rd + vCN + δCCN | 0.02        |
|                           |         | 624                              | 1207.42             | vCC + s-in-plane-rd + vCN + δCCN | 0.74        |
| 623                       | 1207.78 | vCC + s-in-plane-rd + vCN + δCCN | 0.47                |                                  |             |
| 622                       | 1207.87 | s-in-plane-rd + vCC + vCN+ δCCN  | 0.03                |                                  |             |
| 621                       | 1208.31 | vCC + s-in-plane-rd + vCN + δCCN | 0.00                |                                  |             |
| 1211                      | 1213    | 620                              | 1211.09             | vCC + s-in-plane-rd + vCN + δCCN | 0.01        |
|                           |         | 619                              | 1211.33             | vCC + s-in-plane-rd + vCN + δCNC | 0.00        |



Table S2

| Peaks (cm <sup>-1</sup> ) |         | Mode                                    | v <sub>n</sub>      | Description                              | IR activity |
|---------------------------|---------|-----------------------------------------|---------------------|------------------------------------------|-------------|
| (exp.)                    | (calc.) |                                         | (cm <sup>-1</sup> ) |                                          | (%)         |
|                           |         | 618                                     | 1211.41             | s-in-plane-rd + vCC + vCN + δCNC         | 0.00        |
|                           |         | 617                                     | 1211.72             | s-in-plane-rd + vCC + vCN                | 0.00        |
|                           |         | 616                                     | 1214.02             | s-in-plane-rd + vCC + τCH2               | 0.01        |
|                           |         | 615                                     | 1214.25             | s-in-plane-rd + vCC + vCN + τCH2         | 0.00        |
|                           |         | 614                                     | 1214.31             | s-in-plane-rd + vCC + vCN                | 0.21        |
|                           |         | 613                                     | 1214.63             | s-in-plane-rd + vCC                      | 0.18        |
|                           |         | 612                                     | 1215.20             | s-in-plane-rd + vCC + τCH2               | 0.02        |
|                           |         | 611                                     | 1215.59             | s-in-plane-rd + vCC + τCH2 + δCNC        | 0.02        |
|                           |         | 610                                     | 1215.70             | τCH2 + δCNC + s-in-plane-rd + vCC        | 0.00        |
|                           |         | 609                                     | 1215.84             | s-in-plane-rd + vCC + vCN                | 0.01        |
| 1220                      | 1224    | 608                                     | 1222.02             | δCNC + τCH2 + s-in-plane-rd + δCCN       | 0.01        |
|                           |         | 607                                     | 1222.15             | δCNC + τCH2 + s-in-plane-rd + δCCN       | 0.02        |
|                           |         | 606                                     | 1222.25             | δCNC + τCH2 + s-in-plane-rd + δCCN       | 0.12        |
|                           |         | 605                                     | 1222.26             | τCH2 + δCNC + s-in-plane-rd + δCCN       | 0.13        |
|                           |         | 604                                     | 1222.28             | τCH2 + δCCN + δCNC + s-in-plane-rd       | 0.07        |
|                           |         | 603                                     | 1222.40             | τCH2 + vCC + vCN + δCCN                  | 0.33        |
|                           |         | 602                                     | 1222.47             | τCH2 + vCC + δCCN + s-in-plane-rd        | 0.04        |
|                           |         | 601                                     | 1222.71             | τCH2 + δCCN + δCNC + s-in-plane-rd       | 0.10        |
|                           |         | 600                                     | 1225.55             | τCH2 + δCCN + vCC + δCNC + s-in-plane-rd | 1.09        |
|                           |         | 599                                     | 1225.79             | τCH2 + δCCN + vCC + vCO + s-in-plane-rd  | 0.00        |
|                           |         | 598                                     | 1226.00             | τCH2 + δCCN + vCC + vCN + s-in-plane-rd  | 0.00        |
| 597                       | 1226.03 | τCH2 + vCC + vCN + δCCN + a-in-plane-rd | 0.00                |                                          |             |
| 1234                      | 1240    | 596                                     | 1236.56             | τCH2 + δCNC + δCCN + a-in-plane-rd       | 0.00        |
|                           |         | 595                                     | 1236.73             | τCH2 + δCNC + δCCN + a-in-plane-rd       | 0.00        |
|                           |         | 594                                     | 1237.11             | τCH2 + δCNC + δCCN + a-in-plane-rd       | 0.00        |
|                           |         | 593                                     | 1237.16             | τCH2 + δCNC + δCCN + a-in-plane-rd       | 0.01        |
|                           |         | 592                                     | 1240.12             | τCH2 + δCNC + δCCC + a-in-plane-rd       | 0.16        |
|                           |         | 591                                     | 1240.18             | τCH2 + δCCN + vCC + vCN + s-in-plane-rd  | 0.01        |
|                           |         | 590                                     | 1241.26             | τCH2 + δCNC + δCCC + a-in-plane-rd       | 0.00        |
|                           |         | 589                                     | 1241.61             | τCH2 + δCCN + δCNC + a-in-plane-rd       | 0.01        |
|                           |         | 588                                     | 1242.08             | τCH2 + δCCN + δCNC + a-in-plane-rd       | 0.23        |
|                           |         | 587                                     | 1242.23             | τCH2 + δCCN + δCNC + a-in-plane-rd       | 0.01        |
|                           |         | 586                                     | 1243.25             | τCH2 + δCCN + δCNC + a-in-plane-rd       | 0.06        |
| 585                       | 1243.39 | τCH2 + δCCN + δCNC + a-in-plane-rd      | 0.01                |                                          |             |
| 1246                      | 1246    | 584                                     | 1246.77             | τCH2 + δCCN + δCNC + a-in-plane-rd       | 1.24        |
|                           |         | 583                                     | 1246.84             | τCH2 + δCCN + δCNC + a-in-plane-rd       | 0.33        |
|                           |         | 582                                     | 1246.96             | τCH2 + δCCN + δCNC + a-in-plane-rd       | 0.00        |
|                           |         | 581                                     | 1247.37             | τCH2 + δCCN + δCNC + a-in-plane-rd       | 0.02        |
|                           |         | 580                                     | 1248.13             | τCH2 + vCC + vCN + a-in-plane-rd         | 0.00        |
|                           |         | 579                                     | 1248.29             | τCH2 + vCC + vCN + a-in-plane-rd         | 0.01        |
|                           |         | 578                                     | 1248.50             | τCH2 + vCC + vCN + a-in-plane-rd         | 0.00        |
| 577                       | 1248.77 | τCH2 + vCC + vCN + a-in-plane-rd        | 0.00                |                                          |             |
| 1264                      | 1266    | 576                                     | 1265.86             | vCC + vCN + δCCN + a-in-plane-rd         | 0.20        |
|                           |         | 575                                     | 1266.18             | δCCN + δCNC + vCC + vCN                  | 3.86        |
|                           |         | 574                                     | 1266.24             | δCCN + vCC + vCN + δCNC                  | 5.20        |
|                           |         | 573                                     | 1266.66             | vCC + vCN + δCCN + a-in-plane-rd         | 0.16        |
|                           |         | 572                                     | 1266.85             | vCN + vCC + δCCN + a-in-plane-rd         | 0.31        |
|                           |         | 571                                     | 1267.24             | vCN + vCC + δCCN + a-in-plane-rd         | 1.61        |
|                           |         | 570                                     | 1267.48             | vCN + vCC + δCCN + a-in-plane-rd         | 0.04        |
| 569                       | 1267.60 | vCN + vCC + δCCN + a-in-plane-rd        | 0.04                |                                          |             |
| 1270                      | 1278    | 568                                     | 1277.68             | vCN + vCC + δCCN + a-in-plane-rd         | 0.01        |

Table S2

| Peaks (cm <sup>-1</sup> ) |         | Mode                               | v <sub>n</sub>      | Description                       | IR activity |
|---------------------------|---------|------------------------------------|---------------------|-----------------------------------|-------------|
| (exp.)                    | (calc.) |                                    | (cm <sup>-1</sup> ) |                                   | (%)         |
|                           |         | 567                                | 1277.78             | vCC + vCN + δCCN + a-in-plane-rd  | 0.01        |
|                           |         | 566                                | 1278.09             | vCC + vCN + δCCN + a-in-plane-rd  | 2.38        |
|                           |         | 565                                | 1278.20             | vCN + vCC + δCCN + a-in-plane-rd  | 0.10        |
|                           |         | 564                                | 1280.62             | vCC + vCN + δCCN + a-in-plane-rd  | 0.18        |
|                           |         | 563                                | 1280.71             | δCCN + vCC + vCN + δCNC           | 11.70       |
|                           |         | 562                                | 1281.80             | δCCN + vCC + vCN + δCNC           | 0.03        |
|                           |         | 561                                | 1282.10             | δCCN + vCC + vCN + a-in-plane-rd  | 2.24        |
| 1284                      | 1285    | 560                                | 1286.35             | vCC + vCN + δCCN + s-in-plane-rd  | 3.17        |
|                           |         | 559                                | 1286.55             | δCCN + vCC + vCN + s-in-plane-rd  | 0.62        |
|                           |         | 558                                | 1286.68             | δCCN + vCC + vCN + a-in-plane-rd  | 0.01        |
|                           |         | 557                                | 1286.86             | vCC + vCN + δCCN + a-in-plane-rd  | 0.83        |
|                           |         | 556                                | 1286.99             | vCC + δCCN + vCN + a-in-plane-rd  | 3.58        |
|                           |         | 555                                | 1287.10             | vCC + δCCN + vCN + s-in-plane-rd  | 0.11        |
|                           |         | 554                                | 1287.28             | vCC + δCCN + vCN + s-in-plane-rd  | 0.01        |
|                           |         | 553                                | 1287.69             | δCCN + vCC + vCN + a-in-plane-rd  | 0.01        |
|                           |         | 552                                | 1293.16             | δCCN + vCC + vCN + a-in-plane-rd  | 0.01        |
|                           |         | 551                                | 1293.36             | vCC + δCCN + vCN + a-in-plane-rd  | 0.08        |
|                           |         | 550                                | 1293.40             | vCC + δCCN + vCN + a-in-plane-rd  | 0.53        |
|                           |         | 549                                | 1293.78             | δCCN + vCC + vCN + a-in-plane-rd  | 0.01        |
|                           |         | 548                                | 1298.25             | vCC + δCCN + vCN + a-in-plane-rd  | 0.00        |
|                           |         | 547                                | 1298.41             | vCC + δCCN + δCNC + a-in-plane-rd | 0.82        |
|                           |         | 546                                | 1298.44             | vCC + δCCN + vCN + a-in-plane-rd  | 0.09        |
| 545                       | 1298.59 | vCC + δCCN + vCN + a-in-plane-rd   | 0.00                |                                   |             |
| 1302                      | 1303    | 544                                | 1303.13             | vCC + δCCN + vCN + a-in-plane-rd  | 0.29        |
|                           |         | 543                                | 1303.34             | vCC + δCCN + vCN + a-in-plane-rd  | 0.01        |
|                           |         | 542                                | 1303.48             | vCC + δCCN + vCN + a-in-plane-rd  | 4.60        |
|                           |         | 541                                | 1303.69             | vCC + δCCN + vCN + a-in-plane-rd  | 0.48        |
|                           |         | 540                                | 1304.20             | vCC + δCCN + vCN + s-in-plane-rd  | 0.01        |
|                           |         | 539                                | 1304.82             | δCCN + vCC + vCN + s-in-plane-rd  | 0.14        |
|                           |         | 538                                | 1304.93             | δCCN + a-in-plane-rd + vCC + vCN  | 1.06        |
|                           |         | 537                                | 1305.12             | δCCN + a-in-plane-rd + vCC + vCN  | 0.19        |
|                           |         | 536                                | 1305.23             | δCCN + vCC + vCN + a-in-plane-rd  | 0.63        |
|                           |         | 535                                | 1305.38             | δCCN + vCC + a-in-plane-rd + δCNC | 0.00        |
|                           |         | 534                                | 1305.54             | δCCN + vCC + a-in-plane-rd + δCNC | 0.15        |
|                           |         | 533                                | 1305.70             | δCCN + vCC + a-in-plane-rd + δCNC | 0.01        |
|                           |         | 532                                | 1306.36             | δCCN + vCC + δCNC + a-in-plane-rd | 0.00        |
|                           |         | 531                                | 1307.24             | δCCN + vCC + δCNC + a-in-plane-rd | 0.00        |
|                           |         | 530                                | 1307.60             | δCCN + vCC + δCNC + a-in-plane-rd | 0.01        |
|                           |         | 529                                | 1307.98             | δCCN + vCC + δCNC                 | 0.01        |
|                           |         | 528                                | 1308.48             | δCCN + vCC + δCNC + a-in-plane-rd | 0.00        |
|                           |         | 527                                | 1308.83             | δCCN + vCC + δCNC + τCH2          | 0.03        |
|                           |         | 526                                | 1309.18             | δCCN + vCC + δCNC + τCH2          | 0.06        |
|                           |         | 525                                | 1309.48             | δCCN + vCC + δCNC                 | 0.00        |
| 524                       | 1309.78 | δCCN + vCC + δCNC                  | 0.01                |                                   |             |
| 523                       | 1309.87 | vCC + δCNC + τCH2 + a-in-plane-rd  | 0.66                |                                   |             |
| 522                       | 1310.41 | vCC + δCNC + τCH2 + a-in-plane-rd  | 0.00                |                                   |             |
| 521                       | 1311.16 | δCCN + δCNC + τCH2 + a-in-plane-rd | 0.00                |                                   |             |
| 1323                      | 1317    | 520                                | 1317.23             | δCCN + δCNC + τCH2                | 0.00        |
|                           |         | 519                                | 1317.34             | δCCN + δCNC + τCH2                | 0.00        |
|                           |         | 518                                | 1318.27             | δCCN + δCNC + τCH2                | 0.07        |
|                           |         | 517                                | 1318.53             | vCC + δCNC + τCH2                 | 0.42        |



Table S2

| Peaks (cm <sup>-1</sup> ) |         | Mode    | v <sub>n</sub>             | Description                       | IR activity                |                      |      |
|---------------------------|---------|---------|----------------------------|-----------------------------------|----------------------------|----------------------|------|
| (exp.)                    | (calc.) |         | (cm <sup>-1</sup> )        |                                   | (%)                        |                      |      |
|                           |         | 516     | 1319.08                    | vCC + τCH2 + δCNC                 | 0.44                       |                      |      |
|                           |         | 515     | 1319.33                    | vCC + ωCH2 + δCNC                 | 0.02                       |                      |      |
|                           |         | 514     | 1319.64                    | δCCN + δCNC + ωCH2                | 2.11                       |                      |      |
|                           |         | 513     | 1320.25                    | vCC + ωCH2+ δCNC                  | 0.01                       |                      |      |
| 1355                      | 1348    | 496     | 1347.01                    | ωCH2 + δCNC + vCC+ a-in-plane-rd  | 0.35                       |                      |      |
|                           |         | 495     | 1347.42                    | ωCH2 + δCNC + vCC+ a-in-plane-rd  | 0.07                       |                      |      |
|                           |         | 494     | 1347.47                    | ωCH2 + δCNC + vCC+ a-in-plane-rd  | 0.00                       |                      |      |
|                           |         | 493     | 1347.72                    | ωCH2 + δCNC + vCC                 | 0.61                       |                      |      |
|                           |         | 492     | 1348.13                    | ωCH2 + δCNC + vCC                 | 0.07                       |                      |      |
|                           |         | 491     | 1348.24                    | δCNC + vCC + ωCH2                 | 0.01                       |                      |      |
|                           |         | 490     | 1348.43                    | ωCH2 + vCC + δCNC + a-in-plane-rd | 0.02                       |                      |      |
|                           |         | 489     | 1348.97                    | vCC + ωCH2 + δCNC + a-in-plane-rd | 0.00                       |                      |      |
|                           |         | 488     | 1351.27                    | ωCH2 + vCC + δCNC + a-in-plane-rd | 0.00                       |                      |      |
|                           |         | 487     | 1351.57                    | ωCH2 + vCC + δCNC + a-in-plane-rd | 0.00                       |                      |      |
|                           |         | 486     | 1351.72                    | ωCH2 + vCC + δCNC + a-in-plane-rd | 0.00                       |                      |      |
|                           |         | 485     | 1351.81                    | ωCH2 + vCC + δCNC + a-in-plane-rd | 0.01                       |                      |      |
|                           |         | 484     | 1352.75                    | ωCH2 + vCC + δCNC + a-in-plane-rd | 0.09                       |                      |      |
|                           |         | 483     | 1353.00                    | ωCH2 + vCC + vCN + a-in-plane-rd  | 0.01                       |                      |      |
|                           |         | 482     | 1353.35                    | ωCH2 + vCC + vCN + a-in-plane-rd  | 0.22                       |                      |      |
|                           |         | 481     | 1353.52                    | ωCH2 + a-in-plane-rd+ vCC + vCN   | 0.03                       |                      |      |
|                           |         |         | 1365                       | 480                               | 1363.81                    | a-in-plane-rd + δCCN | 0.00 |
|                           |         |         |                            | 479                               | 1363.88                    | a-in-plane-rd + δCCN | 0.09 |
|                           |         | 478     |                            | 1363.90                           | a-in-plane-rd + δCCN       | 0.71                 |      |
|                           |         | 477     |                            | 1364.00                           | a-in-plane-rd + δCCN       | 0.46                 |      |
|                           |         | 476     |                            | 1364.09                           | a-in-plane-rd + vCC + vCN  | 0.94                 |      |
|                           |         | 475     |                            | 1364.28                           | a-in-plane-rd + δCCN       | 0.19                 |      |
|                           |         | 474     |                            | 1364.31                           | a-in-plane-rd + vCC + δCCN | 0.39                 |      |
|                           |         | 473     |                            | 1364.35                           | a-in-plane-rd + δCCN       | 0.25                 |      |
|                           |         | 472     |                            | 1364.52                           | a-in-plane-rd + δCCN       | 1.15                 |      |
|                           |         | 471     |                            | 1364.63                           | a-in-plane-rd + vCC + vCN  | 0.11                 |      |
|                           |         | 470     |                            | 1364.70                           | a-in-plane-rd + vCC        | 0.18                 |      |
|                           |         | 469     |                            | 1364.82                           | a-in-plane-rd + vCC        | 1.52                 |      |
|                           |         | 468     |                            | 1364.87                           | a-in-plane-rd + vCC + vCN  | 0.11                 |      |
|                           |         | 467     |                            | 1364.89                           | a-in-plane-rd + vCC + δCCN | 0.07                 |      |
|                           |         | 466     |                            | 1364.94                           | a-in-plane-rd + vCC + δCCN | 0.41                 |      |
|                           |         | 465     |                            | 1364.96                           | a-in-plane-rd + δCCN       | 0.34                 |      |
|                           |         | 464     |                            | 1365.11                           | a-in-plane-rd + vCC + δCCN | 0.01                 |      |
|                           |         | 463     |                            | 1365.28                           | a-in-plane-rd + δCCN       | 0.02                 |      |
|                           |         | 462     |                            | 1365.36                           | a-in-plane-rd + δCCN       | 0.21                 |      |
|                           |         | 461     |                            | 1365.39                           | a-in-plane-rd + δCCN       | 0.03                 |      |
|                           |         | 460     |                            | 1366.42                           | a-in-plane-rd + δCCN       | 0.65                 |      |
|                           |         | 459     |                            | 1366.61                           | a-in-plane-rd + δCCN       | 0.00                 |      |
|                           |         | 458     |                            | 1366.62                           | a-in-plane-rd + vCC + vCN  | 0.01                 |      |
|                           |         | 457     | 1366.70                    | a-in-plane-rd + vCC + vCN         | 0.01                       |                      |      |
|                           |         | 456     | 1367.20                    | a-in-plane-rd + vCC + vCN         | 0.28                       |                      |      |
|                           | 455     | 1367.37 | a-in-plane-rd + vCC + vCN  | 0.09                              |                            |                      |      |
|                           | 454     | 1367.55 | a-in-plane-rd + vCC + vCN  | 0.00                              |                            |                      |      |
|                           | 453     | 1367.66 | a-in-plane-rd + vCC + vCN  | 0.00                              |                            |                      |      |
|                           | 452     | 1368.56 | a-in-plane-rd + vCC + δCCN | 0.00                              |                            |                      |      |
|                           | 451     | 1368.70 | a-in-plane-rd + vCC + δCCN | 0.00                              |                            |                      |      |
|                           | 450     | 1368.88 | a-in-plane-rd + vCC + δCCN | 0.02                              |                            |                      |      |

Table S2

| Peaks (cm <sup>-1</sup> ) |         | Mode                           | v <sub>n</sub>      | Description                    | IR activity |
|---------------------------|---------|--------------------------------|---------------------|--------------------------------|-------------|
| (exp.)                    | (calc.) |                                | (cm <sup>-1</sup> ) |                                | (%)         |
|                           |         | 449                            | 1368.99             | a-in-plane-rd + vCC + δCCN     | 0.06        |
| 1421                      | 1418    | 448                            | 1410.86             | a-in-plane-rd + δCCN           | 0.77        |
|                           |         | 447                            | 1411.30             | a-in-plane-rd + δCCN           | 0.03        |
|                           |         | 446                            | 1411.55             | a-in-plane-rd + δCCN           | 0.08        |
|                           |         | 445                            | 1411.70             | δCCN + a-in-plane-rd           | 0.05        |
|                           |         | 444                            | 1411.89             | a-in-plane-rd + δCCN           | 0.00        |
|                           |         | 443                            | 1412.12             | a-in-plane-rd + δCCN           | 0.00        |
|                           |         | 442                            | 1412.46             | δCCN + a-in-plane-rd + vCO     | 0.00        |
|                           |         | 441                            | 1412.53             | a-in-plane-rd + δCCN           | 0.00        |
|                           |         | 440                            | 1413.06             | a-in-plane-rd + δCCN + sci-CH2 | 0.00        |
|                           |         | 439                            | 1413.50             | a-in-plane-rd + δCCN + sci-CH2 | 0.22        |
|                           |         | 438                            | 1413.66             | a-in-plane-rd + δCCN + sci-CH2 | 0.00        |
|                           |         | 437                            | 1414.08             | a-in-plane-rd + δCCN + sci-CH2 | 0.49        |
|                           |         | 436                            | 1414.19             | a-in-plane-rd + δCCN + vCO     | 0.02        |
|                           |         | 435                            | 1414.23             | a-in-plane-rd + δCCN + vCN     | 1.72        |
|                           |         | 434                            | 1414.93             | a-in-plane-rd + δCCN + vCO     | 0.02        |
|                           |         | 433                            | 1415.14             | a-in-plane-rd + δCCN + vCO     | 0.00        |
|                           |         | 432                            | 1415.15             | a-in-plane-rd + δCCN + vCO     | 0.00        |
|                           |         | 431                            | 1415.80             | a-in-plane-rd + δCCN           | 0.18        |
|                           |         | 430                            | 1415.83             | a-in-plane-rd + δCCN           | 0.04        |
|                           |         | 429                            | 1416.15             | a-in-plane-rd + δCCN           | 0.00        |
|                           |         | 428                            | 1417.08             | a-in-plane-rd + δCCN           | 0.00        |
|                           |         | 427                            | 1417.49             | a-in-plane-rd + δCCN           | 0.02        |
|                           |         | 426                            | 1417.64             | a-in-plane-rd + δCCN           | 0.00        |
|                           |         | 425                            | 1417.68             | a-in-plane-rd + δCCN           | 0.00        |
|                           |         | 424                            | 1417.74             | a-in-plane-rd + δCCN           | 0.00        |
|                           |         | 423                            | 1418.21             | a-in-plane-rd + δCCN           | 4.44        |
|                           |         | 422                            | 1418.33             | a-in-plane-rd + δCCN           | 0.06        |
|                           |         | 421                            | 1418.40             | a-in-plane-rd + δCCN           | 0.03        |
|                           |         | 420                            | 1418.42             | δCCN + a-in-plane-rd           | 0.01        |
|                           |         | 419                            | 1418.44             | δCCN + a-in-plane-rd           | 0.01        |
|                           |         | 418                            | 1419.31             | δCCN + a-in-plane-rd           | 0.05        |
|                           |         | 417                            | 1419.38             | sci-CH2 + δCCN + a-in-plane-rd | 0.01        |
|                           |         | 416                            | 1422.10             | sci-CH2 + δCCN + a-in-plane-rd | 0.01        |
|                           |         | 415                            | 1422.21             | sci-CH2 + δCCN + a-in-plane-rd | 0.00        |
|                           |         | 414                            | 1422.95             | sci-CH2 + δCCN + a-in-plane-rd | 0.08        |
|                           |         | 413                            | 1422.99             | sci-CH2 + δCCN + a-in-plane-rd | 0.10        |
| 412                       | 1423.11 | sci-CH2 + δCCN + a-in-plane-rd | 0.29                |                                |             |
| 411                       | 1423.31 | sci-CH2 + δCCN + a-in-plane-rd | 0.41                |                                |             |
| 410                       | 1423.63 | sci-CH2 + δCCN + a-in-plane-rd | 0.42                |                                |             |
| 409                       | 1423.72 | sci-CH2 + δCCN + a-in-plane-rd | 0.00                |                                |             |
| 408                       | 1426.90 | sci-CH2 + δCCN + a-in-plane-rd | 0.07                |                                |             |
| 407                       | 1426.98 | sci-CH2 + δCCN + a-in-plane-rd | 0.04                |                                |             |
| 406                       | 1427.20 | sci-CH2 + δCCN + a-in-plane-rd | 0.05                |                                |             |
| 405                       | 1427.56 | sci-CH2 + δCCN + a-in-plane-rd | 0.03                |                                |             |
| 404                       | 1427.75 | sci-CH2 + δCCN + a-in-plane-rd | 0.04                |                                |             |
| 403                       | 1427.85 | sci-CH2 + δCCN + a-in-plane-rd | 0.05                |                                |             |
| 402                       | 1427.93 | sci-CH2 + δCCN + a-in-plane-rd | 0.02                |                                |             |
| 401                       | 1428.30 | sci-CH2 + δCCN + a-in-plane-rd | 0.02                |                                |             |
| 1434                      | 1436    | 400                            | 1436.24             | sci-CH2 + δCCN + a-in-plane-rd | 0.48        |
|                           |         | 399                            | 1436.47             | sci-CH2 + δCCN + a-in-plane-rd | 0.96        |

Table S2

| Peaks (cm <sup>-1</sup> ) |         | Mode                      | v <sub>n</sub>      | Description                    | IR activity |
|---------------------------|---------|---------------------------|---------------------|--------------------------------|-------------|
| (exp.)                    | (calc.) |                           | (cm <sup>-1</sup> ) |                                | (%)         |
|                           |         | 398                       | 1437.67             | sci-CH2 + δCCN + a-in-plane-rd | 0.03        |
|                           |         | 397                       | 1437.78             | sci-CH2 + δCCN + a-in-plane-rd | 0.08        |
| 1477                      | 1472    | 396                       | 1462.51             | sci-CH2 + δCCN                 | 0.00        |
|                           |         | 395                       | 1462.63             | sci-CH2 + δCCN + a-in-plane-rd | 0.00        |
|                           |         | 394                       | 1463.19             | sci-CH2 + δCCN + a-in-plane-rd | 0.00        |
|                           |         | 393                       | 1463.39             | sci-CH2 + δCCN + a-in-plane-rd | 0.00        |
|                           |         | 392                       | 1468.86             | sci-CH2 + δCCN + a-in-plane-rd | 0.11        |
|                           |         | 391                       | 1469.22             | sci-CH2 + δCCN + a-in-plane-rd | 0.13        |
|                           |         | 390                       | 1469.41             | sci-CH2 + δCCN + a-in-plane-rd | 0.29        |
|                           |         | 389                       | 1469.52             | sci-CH2 + δCCN + a-in-plane-rd | 0.13        |
|                           |         | 388                       | 1469.81             | sci-CH2 + δCCN + a-in-plane-rd | 0.01        |
|                           |         | 387                       | 1469.84             | sci-CH2 + δCCN + a-in-plane-rd | 0.11        |
|                           |         | 386                       | 1470.12             | sci-CH2 + δCCN                 | 0.00        |
|                           |         | 385                       | 1470.33             | a-in-plane-rd + vCC + vCN      | 0.00        |
|                           |         | 384                       | 1470.40             | a-in-plane-rd + vCC + vCN      | 0.00        |
|                           |         | 383                       | 1470.44             | a-in-plane-rd + vCC + vCN      | 0.01        |
|                           |         | 382                       | 1470.54             | a-in-plane-rd + vCC + vCN      | 0.06        |
|                           |         | 381                       | 1470.68             | a-in-plane-rd + vCC + vCN      | 0.00        |
|                           |         | 380                       | 1471.90             | a-in-plane-rd + vCC + vCN      | 0.03        |
|                           |         | 379                       | 1472.18             | a-in-plane-rd + vCC + vCN      | 0.26        |
|                           |         | 378                       | 1472.42             | a-in-plane-rd + vCC + vCN      | 0.05        |
|                           |         | 377                       | 1472.44             | vCC + a-in-plane-rd + vCN      | 0.04        |
|                           |         | 376                       | 1472.47             | a-in-plane-rd + vCC + vCN      | 0.04        |
|                           |         | 375                       | 1472.53             | vCC + a-in-plane-rd + vCN      | 0.12        |
|                           |         | 374                       | 1472.67             | vCC + a-in-plane-rd + vCN      | 1.17        |
| 373                       | 1472.79 | vCC + a-in-plane-rd + vCN | 0.01                |                                |             |
| 372                       | 1472.98 | vCC + s-in-plane-rd + vCN | 1.55                |                                |             |
| 371                       | 1473.04 | vCC + a-in-plane-rd + vCN | 0.04                |                                |             |
| 370                       | 1473.17 | vCC + s-in-plane-rd + vCN | 0.01                |                                |             |
| 369                       | 1473.35 | vCC + s-in-plane-rd + vCN | 0.01                |                                |             |
| 1501                      | 1505    | 368                       | 1505.02             | vCC + s-in-plane-rd + vCN      | 0.36        |
|                           |         | 367                       | 1505.03             | vCC + s-in-plane-rd            | 1.07        |
|                           |         | 366                       | 1505.16             | vCC + s-in-plane-rd            | 0.45        |
|                           |         | 365                       | 1505.21             | vCC + s-in-plane-rd            | 0.37        |
|                           |         | 364                       | 1505.28             | vCC + s-in-plane-rd            | 0.02        |
|                           |         | 363                       | 1505.33             | vCC + s-in-plane-rd            | 0.05        |
|                           |         | 362                       | 1505.57             | vCC + s-in-plane-rd            | 0.00        |
|                           |         | 361                       | 1505.62             | vCC + a-in-plane-rd            | 0.00        |
| 1512                      | 1510    | 360                       | 1509.06             | vCC + a-in-plane-rd + vCN      | 0.00        |
|                           |         | 359                       | 1509.11             | vCC + a-in-plane-rd            | 0.00        |
|                           |         | 358                       | 1509.34             | a-in-plane-rd + vCC            | 0.00        |
|                           |         | 357                       | 1509.42             | vCC + a-in-plane-rd            | 0.28        |
| 1523                      |         | 356                       | 1510.90             | vCC + a-in-plane-rd            | 0.00        |
|                           |         | 355                       | 1510.99             | a-in-plane-rd + vCC            | 0.00        |
|                           |         | 354                       | 1511.16             | a-in-plane-rd + vCC            | 0.30        |
|                           |         | 353                       | 1511.27             | a-in-plane-rd + vCC            | 0.09        |
| 1530                      | 1521    | 352                       | 1520.34             | vCN + δCNH + vCC + vNC         | 4.25        |
|                           |         | 351                       | 1520.40             | vCC + vCN + δCNH + vNC         | 1.92        |
|                           |         | 350                       | 1520.95             | vCN + vCC + δCNH + vNC         | 18.50       |
|                           |         | 349                       | 1520.99             | vCN + vCC + δCNH + vNC         | 24.62       |
|                           |         | 348                       | 1521.05             | vCN + δCNH + vNC + vCC         | 6.25        |

Table S2

| Peaks (cm <sup>-1</sup> ) |         | Mode                             | v <sub>n</sub>      | Description                      | IR activity |
|---------------------------|---------|----------------------------------|---------------------|----------------------------------|-------------|
| (exp.)                    | (calc.) |                                  | (cm <sup>-1</sup> ) |                                  | (%)         |
|                           |         | 347                              | 1521.11             | vCN + vCC + δCNH + vNC           | 10.98       |
|                           |         | 346                              | 1521.32             | vCN + vCC + δCNH + vNC           | 0.85        |
|                           |         | 345                              | 1521.47             | vCN + vCC + δCNH + vNC           | 5.67        |
|                           |         | 344                              | 1521.77             | vCC + vCN + δCNH + vNC           | 0.38        |
|                           |         | 343                              | 1521.95             | vCN + vCC + δCNH + vNC           | 3.71        |
|                           |         | 342                              | 1521.98             | vCN + vCC + vNC + δCNH           | 3.80        |
|                           |         | 341                              | 1522.42             | vCN + vCC + vNC + δCNH           | 0.19        |
|                           |         | 340                              | 1522.74             | vCN + δCCN + δCNH                | 0.12        |
|                           |         | 339                              | 1523.41             | vCN + vCC + vNC + δCNH           | 0.00        |
|                           |         | 338                              | 1523.71             | vCN + vCC + vNC + δCNH           | 0.08        |
|                           |         | 337                              | 1525.57             | vCN + vCC + vNC + δCNH           | 0.92        |
| 1535                      | 1528    | 336                              | 1527.66             | vCN + vCC + vNC + δCNH           | 9.91        |
|                           |         | 335                              | 1527.91             | vCN + vCC + vNC + δCNH           | 0.25        |
|                           |         | 334                              | 1528.95             | vCN + vCC + vNC + δCNH           | 16.62       |
|                           |         | 333                              | 1529.21             | vCN + vCC                        | 0.05        |
|                           |         | 332                              | 1529.71             | vCN + vCC + vNC + δCNH           | 0.01        |
|                           |         | 331                              | 1529.84             | vCC + vCN + vNC + δCNH           | 0.43        |
|                           |         | 330                              | 1529.93             | vCC + vCN + vNC + δCNH           | 0.12        |
|                           |         | 329                              | 1530.76             | vCN + vCC + vNC + δCNH           | 0.02        |
|                           |         | 328                              | 1532.71             | vCN + vCC + vNC + δCNH           | 0.00        |
|                           |         | 327                              | 1533.11             | vCN + vNC + δCNH                 | 0.00        |
|                           |         | 326                              | 1533.43             | vCN + vNC + δCNH                 | 0.02        |
|                           |         | 325                              | 1533.88             | vCN + vNC + δCNH                 | 0.11        |
| 1546                      | 1537    | 324                              | 1537.19             | vCN + vNC + δCNH                 | 12.91       |
|                           |         | 323                              | 1537.69             | vCN + vNC + δCNH                 | 0.19        |
|                           |         | 322                              | 1538.05             | vCN + vNC + δCNH                 | 0.02        |
|                           |         | 321                              | 1540.77             | vCN + vNC + δCNH                 | 0.04        |
| 1579                      | 1574    | 320                              | 1569.41             | vCC + a-in-plane-rd + δCCN       | 0.00        |
|                           |         | 319                              | 1569.77             | vCC + a-in-plane-rd + δCCN       | 0.02        |
|                           |         | 318                              | 1569.86             | vCC + s-in-plane-rd + δCCN       | 0.12        |
|                           |         | 317                              | 1569.96             | vCC + s-in-plane-rd + δCCN       | 0.01        |
|                           |         | 316                              | 1570.11             | vCC + s-in-plane-rd + vCO + δCCN | 0.00        |
|                           |         | 315                              | 1570.20             | vCC + a-in-plane-rd + vCO + δCCN | 0.00        |
|                           |         | 314                              | 1570.27             | vCC + a-in-plane-rd + vCO + δCCN | 0.00        |
|                           |         | 313                              | 1570.32             | vCC + a-in-plane-rd + vCO + δCCN | 0.02        |
|                           |         | 312                              | 1572.84             | vCC + a-in-plane-rd + vCO + δCCN | 2.11        |
|                           |         | 311                              | 1573.04             | vCC + s-in-plane-rd + vCO + δCCN | 1.11        |
|                           |         | 310                              | 1573.23             | vCC + s-in-plane-rd + vCO + δCCN | 0.01        |
|                           |         | 309                              | 1573.40             | vCC + vCO + δCCN + a-in-plane-rd | 0.03        |
|                           |         | 308                              | 1573.50             | vCC + vCO + δCCN + s-in-plane-rd | 1.17        |
|                           |         | 307                              | 1573.57             | vCC + vCO + δCCN + s-in-plane-rd | 5.53        |
|                           |         | 306                              | 1573.69             | vCC + vCO + δCCN + s-in-plane-rd | 0.17        |
|                           |         | 305                              | 1574.00             | vCC + vCO + δCCN + s-in-plane-rd | 0.37        |
|                           |         | 304                              | 1574.76             | vCC + vCO + δCCN + a-in-plane-rd | 4.43        |
|                           |         | 303                              | 1575.05             | vCC + s-in-plane-rd + vCO        | 0.03        |
|                           |         | 302                              | 1575.16             | vCC + δCCN + in-plane-rd         | 3.86        |
|                           |         | 301                              | 1575.43             | vCC + δCCN + in-plane-rd         | 0.01        |
| 300                       | 1575.66 | vCC + vCO + δCCN + s-in-plane-rd | 0.92                |                                  |             |
| 299                       | 1575.86 | vCC + vCO + δCCN + a-in-plane-rd | 0.00                |                                  |             |
| 298                       | 1576.02 | vCC + a-in-plane-rd + vCO + δCCN | 0.53                |                                  |             |
| 297                       | 1576.27 | vCC + δCNC + a-in-plane-rd       | 0.00                |                                  |             |

Table S2

| Peaks (cm <sup>-1</sup> ) |         | Mode                                   | v <sub>n</sub>      | Description                                | IR activity |
|---------------------------|---------|----------------------------------------|---------------------|--------------------------------------------|-------------|
| (exp.)                    | (calc.) |                                        | (cm <sup>-1</sup> ) |                                            | (%)         |
|                           |         | 296                                    | 1578.92             | a-in-plane-rd                              | 0.01        |
|                           |         | 295                                    | 1579.11             | a-in-plane-rd + s-in-plane-rd              | 0.01        |
|                           |         | 294                                    | 1579.21             | a-in-plane-rd + s-in-plane-rd              | 0.02        |
|                           |         | 293                                    | 1579.35             | a-in-plane-rd                              | 0.04        |
|                           |         | 292                                    | 1579.47             | a-in-plane-rd                              | 0.00        |
|                           |         | 291                                    | 1579.66             | a-in-plane-rd                              | 0.00        |
|                           |         | 290                                    | 1579.77             | a-in-plane-rd                              | 0.00        |
|                           |         | 289                                    | 1579.89             | a-in-plane-rd                              | 0.00        |
| 1602                      | 1592    | 288                                    | 1591.64             | vCC + vCO + δCNC + a-in-plane-rd           | 0.00        |
|                           |         | 287                                    | 1592.01             | vCC + vCO + δCNC + a-in-plane-rd           | 0.00        |
|                           |         | 286                                    | 1592.17             | vCC + vCO + δCNC + a-in-plane-rd           | 0.02        |
|                           |         | 285                                    | 1592.25             | vCO + vCC + δCCN + a-in-plane-rd           | 0.02        |
|                           |         | 284                                    | 1592.61             | vCO + vCC + δCCN + a-in-plane-rd           | 2.24        |
|                           |         | 283                                    | 1592.64             | vCO + vCC + δCCN + a-in-plane-rd           | 1.74        |
|                           |         | 282                                    | 1592.95             | vCO + s-in-plane-rd + vCC + δCCN           | 1.36        |
|                           |         | 281                                    | 1593.04             | vCC + vCO + s-in-plane-rd + vCN + δCCN     | 2.99        |
|                           | 1598    | 280                                    | 1596.90             | a-in-plane-rd + vCO                        | 0.00        |
|                           |         | 279                                    | 1597.08             | vCC + s-in-plane-rd + vCO + δCNC           | 0.18        |
|                           |         | 278                                    | 1597.16             | a-in-plane-rd + vCC + vCO + δCNC           | 0.01        |
|                           |         | 277                                    | 1597.24             | a-in-plane-rd                              | 0.13        |
|                           |         | 276                                    | 1597.49             | vCC + vCO + δCNC + a-in-plane-rd           | 0.00        |
|                           |         | 275                                    | 1597.75             | vCC + vCO + a-in-plane-rd                  | 0.12        |
|                           |         | 274                                    | 1597.93             | vCC + a-in-plane-rd                        | 5.21        |
|                           |         | 273                                    | 1598.19             | vCO + vCN + vCC + δCCN + a-in-plane-rd     | 1.30        |
| 1630                      | 1607    | 272                                    | 1607.73             | vCO + vCN + vCC + δCCN + a-in-plane-rd     | 6.37        |
|                           |         | 271                                    | 1608.04             | vCO + vCN + vCC + δCCN + a-in-plane-rd     | 100.00      |
|                           |         | 270                                    | 1609.20             | vCO + vCN + vCC + δCCN + s-in-plane-rd     | 0.12        |
|                           |         | 269                                    | 1609.26             | vCO + vCN + vCC + δCCN + s-in-plane-rd     | 0.01        |
|                           |         | 268                                    | 1609.36             | s-in-plane-rd + a-in-plane-rd + vCO + δCCN | 0.03        |
|                           |         | 267                                    | 1609.42             | s-in-plane-rd + a-in-plane-rd              | 6.51        |
|                           |         | 266                                    | 1609.46             | s-in-plane-rd + a-in-plane-rd              | 0.08        |
|                           |         | 265                                    | 1609.88             | s-in-plane-rd + a-in-plane-rd              | 0.02        |
|                           |         | 264                                    | 1609.96             | s-in-plane-rd                              | 0.14        |
|                           |         | 263                                    | 1610.10             | s-in-plane-rd                              | 0.02        |
|                           |         | 262                                    | 1610.25             | s-in-plane-rd                              | 3.90        |
|                           |         | 261                                    | 1610.40             | vCC + vCN + δCCN + s-in-plane-rd           | 0.01        |
|                           |         | 260                                    | 1610.72             | vCO + vCN + vCC + δCCN + s-in-plane-rd     | 0.01        |
|                           |         | 259                                    | 1611.44             | vCO + vCC + vCN + δCCN + a-in-plane-rd     | 0.00        |
|                           |         | 258                                    | 1611.45             | vCO + vCC + vCN + δCCN + a-in-plane-rd     | 0.02        |
|                           |         | 257                                    | 1612.20             | vCO + vCC + vCN + δCCN + a-in-plane-rd     | 0.25        |
| 256                       | 1612.37 | vCO + vCC + vCN + δCCN + s-in-plane-rd | 16.72               |                                            |             |
|                           |         | 255                                    | 1612.78             | vCO + vCC + vCN + δCCN + a-in-plane-rd     | 0.00        |
| 1642                      | 1616    | 254                                    | 1613.85             | s-in-plane-rd + vCC + vCN + vCO            | 0.01        |
|                           |         | 253                                    | 1613.94             | s-in-plane-rd + vCC + vCN + vCO            | 5.96        |
|                           |         | 252                                    | 1614.05             | s-in-plane-rd + vCO + vCC + vCN + δCCN     | 0.02        |
|                           |         | 251                                    | 1615.03             | s-in-plane-rd + vCO + vCC + vCN + δCCN     | 0.00        |
|                           |         | 250                                    | 1615.48             | s-in-plane-rd + vCO + vCC + vCN + δCCN     | 0.02        |
|                           |         | 249                                    | 1615.88             | s-in-plane-rd                              | 0.36        |
|                           |         | 248                                    | 1616.42             | vCO + vCC + vCN + δCCN + a-in-plane-rd     | 40.10       |
|                           |         | 247                                    | 1617.00             | vCO + vCC + vCN + δCCN + s-in-plane-rd     | 0.01        |
|                           |         | 246                                    | 1617.06             | vCO + vCC + vCN + δCCN + a-in-plane-rd     | 0.05        |

Table S2

| Peaks (cm <sup>-1</sup> ) |         | Mode                      | v <sub>n</sub>      | Description                            | IR activity |
|---------------------------|---------|---------------------------|---------------------|----------------------------------------|-------------|
| (exp.)                    | (calc.) |                           | (cm <sup>-1</sup> ) |                                        | (%)         |
|                           |         | 245                       | 1617.62             | vCO + vCC + vCN + δCCN + a-in-plane-rd | 41.26       |
|                           |         | 244                       | 1618.86             | vCO + vCC + vCN + δCCN + a-in-plane-rd | 0.00        |
|                           |         | 243                       | 1619.57             | vCO + vCC + vCN + δCCN + s-in-plane-rd | 0.01        |
|                           |         | 242                       | 1619.78             | vCO + vCC + vCN + δCCN + s-in-plane-rd | 0.00        |
|                           |         | 241                       | 1621.39             | vCO + vCN + vCC + δCCN + s-in-plane-rd | 16.18       |
|                           |         | 240                       | 1623.46             | vCO + vCN + vCC + δCCN + s-in-plane-rd | 0.02        |
|                           |         | 239                       | 1623.61             | vCO + vCN + vCC + δCCN + a-in-plane-rd | 0.04        |
|                           |         | 238                       | 1623.78             | vCO + vCN + vCC + δCCN + a-in-plane-rd | 1.13        |
|                           |         | 237                       | 1624.00             | vCO + vCN + vCC + δCCN + a-in-plane-rd | 0.00        |
|                           |         | 236                       | 1625.29             | vCO + vCN + vCC + δCCN + a-in-plane-rd | 0.03        |
|                           |         | 235                       | 1625.45             | vCO + vCN + vCC + δCCN + a-in-plane-rd | 0.00        |
|                           |         | 234                       | 1626.05             | vCO + vCN + vCC + δCCN + a-in-plane-rd | 5.54        |
|                           |         | 233                       | 1626.54             | vCO + vCN + vCC + δCCN + a-in-plane-rd | 0.00        |
| 1661                      | 1640    | 232                       | 1634.36             | vCO + vCN + vCC + δCCN + a-in-plane-rd | 0.00        |
|                           |         | 231                       | 1635.70             | vCO + vCN + vCC + δCCN + a-in-plane-rd | 2.59        |
|                           |         | 230                       | 1635.84             | vCO + vCN + vCC + δCCN + a-in-plane-rd | 0.05        |
|                           |         | 229                       | 1638.14             | vCO + vCN + vCC + δCCN + a-in-plane-rd | 0.02        |
|                           |         | 228                       | 1638.63             | vCO + vCN + vCC + δCCN + a-in-plane-rd | 0.12        |
|                           |         | 227                       | 1638.72             | vCO + vCN + vCC + δCCN + a-in-plane-rd | 0.00        |
|                           |         | 226                       | 1639.99             | vCO + vCN + vCC + δCCN + a-in-plane-rd | 47.70       |
|                           |         | 225                       | 1640.53             | vCO + vCN + vCC + δCCN + a-in-plane-rd | 5.66        |
| 2793                      | 2964    | 224                       | 2961.96             | s-vCH2 + δCCN + vCC + vCN              | 0.09        |
|                           |         | 223                       | 2962.06             | s-vCH2 + δCCN + vCC + vCN              | 0.11        |
|                           |         | 222                       | 2963.48             | s-vCH2 + δCCN + vCC + vCN              | 0.03        |
|                           |         | 221                       | 2964.28             | s-vCH2                                 | 0.09        |
|                           |         | 220                       | 2964.80             | s-vCH2                                 | 0.21        |
|                           |         | 219                       | 2965.72             | s-vCH2 + δCCN                          | 0.13        |
|                           |         | 218                       | 2967.88             | s-vCH2 + δCCN + vCC + vCN              | 0.01        |
|                           |         | 217                       | 2968.13             | s-vCH2 + δCCN + vCC + vCN              | 0.14        |
|                           |         | 216                       | 2968.29             | s-vCH2 + δCCN + vCC + vCN              | 0.01        |
|                           |         | 215                       | 2969.91             | s-vCH2 + δCCN + vCC + vCN              | 0.01        |
|                           |         | 214                       | 2970.10             | s-vCH2 + δCCN + vCC + vCN              | 0.04        |
|                           |         | 213                       | 2970.45             | s-vCH2 + δCCN + vCC + vCN              | 0.10        |
|                           |         | 212                       | 2970.71             | s-vCH2 + δCCN + vCC + vCN              | 0.00        |
|                           |         | 211                       | 2970.90             | s-vCH2 + δCCN + vCC + vCN              | 0.01        |
|                           |         | 210                       | 2970.94             | s-vCH2 + δCCN + vCC + vCN              | 0.01        |
| 209                       | 2971.23 | s-vCH2 + δCCN + vCC + vCN | 0.01                |                                        |             |
| 2850                      | 2991    | 208                       | 2989.47             | s-vCH2 + δCCN + vCC + vCN              | 0.18        |
|                           |         | 207                       | 2990.10             | s-vCH2 + δCCN + vCC + vCN              | 0.12        |
|                           |         | 206                       | 2991.22             | s-vCH2 + δCCN + vCC + vCN              | 0.11        |
|                           |         | 205                       | 2991.37             | s-vCH2 + δCCN + vCC + vCN              | 0.19        |
|                           |         | 204                       | 2992.56             | s-vCH2 + δCCN + vCC + vCN              | 0.11        |
|                           |         | 203                       | 2992.86             | s-vCH2 + δCCN + vCC + vCN              | 0.06        |
|                           |         | 202                       | 2995.23             | s-vCH2 + δCCN + vCC + vCN              | 0.08        |
|                           |         | 201                       | 2996.63             | s-vCH2 + δCCN + vCN + vCC              | 0.08        |
| 2872                      | 3008    | 200                       | 3007.71             | a-vCH2 + δCCN + vCN + vCC              | 0.12        |
|                           |         | 199                       | 3007.85             | a-vCH2 + δCCN + vCN + vCC              | 0.00        |
|                           |         | 198                       | 3008.01             | a-vCH2 + δCCN + vCN + vCC              | 0.25        |
|                           |         | 197                       | 3008.55             | a-vCH2 + δCCN + vCN + vCC              | 0.03        |
|                           |         | 196                       | 3008.69             | a-vCH2 + δCCN + vCN + vCC              | 0.19        |
|                           |         | 195                       | 3008.74             | a-vCH2 + δCCN + vCN + vCC              | 0.03        |

Table S2

| Peaks (cm <sup>-1</sup> ) |         | Mode                    | v <sub>n</sub>      | Description               | IR activity |
|---------------------------|---------|-------------------------|---------------------|---------------------------|-------------|
| (exp.)                    | (calc.) |                         | (cm <sup>-1</sup> ) |                           | (%)         |
|                           |         | 194                     | 3008.93             | a-vCH2 + δCCN + vCN + vCC | 0.00        |
|                           |         | 193                     | 3009.58             | a-vCH2 + δCCN + vCN + vCC | 0.10        |
|                           |         | 192                     | 3009.92             | s-vCH2 + δCCN + vCN + vCC | 0.04        |
|                           |         | 191                     | 3009.99             | s-vCH2 + δCCN + vCN + vCC | 0.03        |
|                           |         | 190                     | 3010.75             | s-vCH2 + δCCN + vCN + vCC | 0.06        |
|                           |         | 189                     | 3010.79             | s-vCH2 + δCCN + vCN + vCC | 0.06        |
|                           |         | 188                     | 3012.12             | s-vCH2 + δCCN + vCN + vCC | 0.03        |
|                           |         | 187                     | 3012.62             | s-vCH2 + δCCN + vCN + vCC | 0.05        |
|                           |         | 186                     | 3012.86             | s-vCH2 + δCCN + vCN + vCC | 0.04        |
|                           |         | 185                     | 3013.66             | s-vCH2 + δCCN + vCN + vCC | 0.04        |
| 2919                      | 3042    | 184                     | 3041.27             | a-vCH2 + δCCN + vCN + vCC | 0.00        |
|                           |         | 183                     | 3041.44             | a-vCH2 + δCCN + vCN       | 0.01        |
|                           |         | 182                     | 3041.69             | a-vCH2 + δCCN + vCN + vNH | 0.01        |
|                           |         | 181                     | 3042.17             | a-vCH2 + δCCN + vCN + vNH | 0.01        |
|                           |         | 180                     | 3042.21             | a-vCH2 + δCCN + vCN + vCC | 0.01        |
|                           |         | 179                     | 3042.38             | a-vCH2 + δCCN             | 0.01        |
|                           |         | 178                     | 3042.47             | a-vCH2 + δCCN + vCN       | 0.00        |
|                           |         | 177                     | 3042.54             | a-vCH2 + δCCN + vCN + vCC | 0.01        |
| 2931                      | 3051    | 176                     | 3050.43             | a-vCH2 + δCCN + vCN + vCC | 0.05        |
|                           |         | 175                     | 3050.71             | a-vCH2 + δCCN + vCN + vCC | 0.05        |
|                           |         | 174                     | 3050.98             | a-vCH2 + δCCN + vCN + vCC | 0.05        |
|                           |         | 173                     | 3050.98             | a-vCH2 + δCCN + vCN + vCC | 0.02        |
|                           |         | 172                     | 3051.08             | a-vCH2 + δCCN + vCN + vCC | 0.07        |
|                           |         | 171                     | 3051.11             | a-vCH2 + δCCN + vCN + vCC | 0.04        |
|                           |         | 170                     | 3051.79             | a-vCH2 + δCCN + vCN + vCC | 0.05        |
|                           |         | 169                     | 3052.50             | a-vCH2 + δCCN + vCN + vCC | 0.05        |
| 2954                      | 3065    | 168                     | 3064.58             | a-vCH2 + δCCN + vCN + vCC | 0.03        |
|                           |         | 167                     | 3064.74             | a-vCH2 + δCCN + vCN + vCC | 0.03        |
|                           |         | 166                     | 3065.07             | a-vCH2 + δCCN + vCN + vCC | 0.03        |
|                           |         | 165                     | 3065.17             | a-vCH2 + δCCN + vCN + vCC | 0.02        |
|                           |         | 164                     | 3065.29             | a-vCH2 + δCCN + vCN + vCC | 0.02        |
|                           |         | 163                     | 3065.42             | a-vCH2 + δCCN + vCN       | 0.04        |
|                           |         | 162                     | 3065.54             | a-vCH2 + δCCN + vCN       | 0.02        |
|                           |         | 161                     | 3065.68             | a-vCH2 + vCN              | 0.02        |
| 3009                      | 3098    | 160                     | 3095.54             | a-r-vCH + a-in-plane-rd   | 0.01        |
|                           |         | 159                     | 3095.77             | a-r-vCH + a-in-plane-rd   | 0.00        |
|                           |         | 158                     | 3095.88             | a-r-vCH + a-in-plane-rd   | 0.00        |
|                           |         | 157                     | 3095.99             | a-r-vCH + a-in-plane-rd   | 0.04        |
|                           |         | 156                     | 3096.52             | a-r-vCH + a-in-plane-rd   | 0.11        |
|                           |         | 155                     | 3096.59             | a-r-vCH + a-in-plane-rd   | 0.05        |
|                           |         | 154                     | 3096.65             | a-r-vCH + a-in-plane-rd   | 0.01        |
|                           |         | 153                     | 3096.73             | a-r-vCH + a-in-plane-rd   | 0.00        |
|                           |         | 152                     | 3097.60             | a-r-vCH + a-in-plane-rd   | 0.17        |
|                           |         | 151                     | 3097.64             | a-r-vCH + a-in-plane-rd   | 0.00        |
|                           |         | 150                     | 3097.67             | a-r-vCH + a-in-plane-rd   | 0.02        |
|                           |         | 149                     | 3097.70             | a-r-vCH + a-in-plane-rd   | 0.10        |
|                           |         | 148                     | 3097.73             | a-r-vCH + a-in-plane-rd   | 0.15        |
|                           |         | 147                     | 3097.79             | a-r-vCH + a-in-plane-rd   | 0.05        |
| 146                       | 3097.80 | a-r-vCH + a-in-plane-rd | 0.37                |                           |             |
|                           |         | 145                     | 3097.84             | a-r-vCH + a-in-plane-rd   | 0.11        |
|                           |         | 144                     | 3097.85             | a-r-vCH + a-in-plane-rd   | 0.00        |



Table S2

| Peaks (cm <sup>-1</sup> ) |         | Mode                | v <sub>n</sub>      | Description             | IR activity |
|---------------------------|---------|---------------------|---------------------|-------------------------|-------------|
| (exp.)                    | (calc.) |                     | (cm <sup>-1</sup> ) |                         | (%)         |
|                           |         | 143                 | 3097.95             | s-r-vCH + s-in-plane-rd | 0.01        |
|                           |         | 142                 | 3098.22             | a-r-vCH + a-in-plane-rd | 0.06        |
|                           |         | 141                 | 3098.24             | a-r-vCH + a-in-plane-rd | 0.02        |
|                           |         | 140                 | 3098.57             | a-r-vCH + a-in-plane-rd | 0.06        |
|                           |         | 139                 | 3098.73             | a-r-vCH + a-in-plane-rd | 0.22        |
|                           |         | 138                 | 3098.78             | a-r-vCH + a-in-plane-rd | 0.00        |
|                           |         | 137                 | 3098.89             | a-r-vCH + a-in-plane-rd | 0.00        |
| 3014                      | 3104    | 136                 | 3104.21             | a-r-vCH + a-in-plane-rd | 0.06        |
|                           |         | 135                 | 3104.38             | a-r-vCH + a-in-plane-rd | 0.02        |
|                           |         | 134                 | 3104.81             | a-r-vCH + a-in-plane-rd | 0.02        |
|                           |         | 133                 | 3104.89             | r-vCH + in-plane-rd     | 0.18        |
|                           |         | 132                 | 3105.07             | r-vCH + in-plane-rd     | 0.42        |
|                           |         | 131                 | 3105.21             | r-vCH + in-plane-rd     | 0.03        |
|                           |         | 130                 | 3105.45             | r-vCH + in-plane-rd     | 0.00        |
|                           |         | 129                 | 3105.56             | r-vCH + in-plane-rd     | 0.08        |
|                           |         | 128                 | 3108.16             | r-vCH + in-plane-rd     | 0.01        |
|                           |         | 127                 | 3108.31             | r-vCH + in-plane-rd     | 0.00        |
|                           |         | 126                 | 3108.56             | r-vCH + in-plane-rd     | 0.02        |
|                           |         | 125                 | 3108.62             | r-vCH + in-plane-rd     | 0.01        |
|                           |         | 124                 | 3108.75             | r-vCH + in-plane-rd     | 0.01        |
|                           |         | 123                 | 3108.76             | r-vCH + in-plane-rd     | 0.00        |
| 122                       | 3108.93 | r-vCH + in-plane-rd | 0.01                |                         |             |
| 121                       | 3109.16 | r-vCH + in-plane-rd | 0.01                |                         |             |
| 3026                      | 3119    | 120                 | 3113.46             | r-vCH + in-plane-rd     | 0.01        |
|                           |         | 119                 | 3113.90             | r-vCH + in-plane-rd     | 0.00        |
|                           |         | 118                 | 3114.06             | r-vCH + in-plane-rd     | 0.02        |
|                           |         | 117                 | 3114.31             | r-vCH                   | 0.00        |
|                           |         | 116                 | 3114.60             | r-vCH                   | 0.01        |
|                           |         | 115                 | 3114.88             | r-vCH + in-plane-rd     | 0.00        |
|                           |         | 114                 | 3115.01             | r-vCH + in-plane-rd     | 0.02        |
|                           |         | 113                 | 3115.32             | r-vCH + in-plane-rd     | 0.00        |
|                           |         | 112                 | 3118.16             | r-vCH + in-plane-rd     | 0.02        |
|                           |         | 111                 | 3118.24             | r-vCH + in-plane-rd     | 0.04        |
|                           |         | 110                 | 3118.49             | r-vCH + in-plane-rd     | 0.01        |
|                           |         | 109                 | 3118.59             | r-vCH + in-plane-rd     | 0.07        |
|                           |         | 108                 | 3118.61             | r-vCH + in-plane-rd     | 0.00        |
|                           |         | 107                 | 3118.64             | r-vCH + in-plane-rd     | 0.20        |
| 106                       | 3118.97 | r-vCH + in-plane-rd | 0.02                |                         |             |
| 105                       | 3119.07 | r-vCH + in-plane-rd | 0.07                |                         |             |
| 3036                      | 3122    | 104                 | 3122.32             | r-vCH + in-plane-rd     | 0.02        |
|                           |         | 103                 | 3122.62             | r-vCH + in-plane-rd     | 0.01        |
|                           |         | 102                 | 3122.80             | r-vCH + in-plane-rd     | 0.04        |
|                           |         | 101                 | 3123.16             | r-vCH + in-plane-rd     | 0.01        |
|                           |         | 100                 | 3123.19             | r-vCH + in-plane-rd     | 0.00        |
|                           |         | 99                  | 3123.29             | r-vCH + in-plane-rd     | 0.05        |
|                           |         | 98                  | 3123.36             | r-vCH + in-plane-rd     | 0.00        |
|                           |         | 97                  | 3123.52             | r-vCH + in-plane-rd     | 0.00        |
|                           |         | 96                  | 3123.67             | r-vCH + in-plane-rd     | 0.10        |
|                           |         | 95                  | 3123.70             | r-vCH + in-plane-rd     | 0.00        |
|                           |         | 94                  | 3123.78             | r-vCH + in-plane-rd     | 0.00        |
| 93                        | 3123.89 | r-vCH + in-plane-rd | 0.02                |                         |             |



Table S2

| Peaks (cm <sup>-1</sup> ) |         | Mode                | v <sub>n</sub>      | Description             | IR activity |
|---------------------------|---------|---------------------|---------------------|-------------------------|-------------|
| (exp.)                    | (calc.) |                     | (cm <sup>-1</sup> ) |                         | (%)         |
|                           |         | 92                  | 3123.96             | r-vCH + in-plane-rd     | 0.00        |
|                           |         | 91                  | 3124.25             | r-vCH + in-plane-rd     | 0.01        |
|                           |         | 90                  | 3124.30             | r-vCH + in-plane-rd     | 0.03        |
|                           |         | 89                  | 3124.39             | r-vCH + in-plane-rd     | 0.00        |
| 3049                      | 3130    | 88                  | 3129.45             | r-vCH + in-plane-rd     | 0.03        |
|                           |         | 87                  | 3129.72             | r-vCH + in-plane-rd     | 0.01        |
|                           |         | 86                  | 3130.37             | r-vCH + in-plane-rd     | 0.01        |
|                           |         | 85                  | 3130.50             | r-vCH + in-plane-rd     | 0.05        |
|                           |         | 84                  | 3130.67             | r-vCH + in-plane-rd     | 0.02        |
|                           |         | 83                  | 3130.77             | s-r-vCH + in-plane-rd   | 0.01        |
|                           |         | 82                  | 3131.43             | r-vCH + in-plane-rd     | 0.02        |
|                           |         | 81                  | 3131.58             | r-vCH + in-plane-rd     | 0.10        |
| 3057                      | 3139    | 80                  | 3137.35             | r-vCH + in-plane-rd     | 0.02        |
|                           |         | 79                  | 3137.53             | s-r-vCH + in-plane-rd   | 0.00        |
|                           |         | 78                  | 3137.78             | r-vCH + in-plane-rd     | 0.00        |
|                           |         | 77                  | 3137.86             | r-vCH + in-plane-rd     | 0.04        |
|                           |         | 76                  | 3138.03             | r-vCH + in-plane-rd     | 0.00        |
|                           |         | 75                  | 3138.14             | s-r-vCH + in-plane-rd   | 0.01        |
|                           |         | 74                  | 3138.34             | r-vCH + in-plane-rd     | 0.02        |
|                           |         | 73                  | 3138.73             | r-vCH + in-plane-rd     | 0.01        |
|                           |         | 72                  | 3139.62             | r-vCH + in-plane-rd     | 0.03        |
|                           |         | 71                  | 3139.75             | r-vCH + in-plane-rd     | 0.00        |
|                           |         | 70                  | 3139.83             | r-vCH + in-plane-rd     | 0.03        |
|                           |         | 69                  | 3139.89             | r-vCH + in-plane-rd     | 0.00        |
|                           |         | 68                  | 3140.48             | r-vCH + in-plane-rd     | 0.02        |
|                           |         | 67                  | 3140.67             | r-vCH + in-plane-rd     | 0.02        |
|                           |         | 66                  | 3140.68             | r-vCH + in-plane-rd     | 0.01        |
|                           |         | 65                  | 3140.86             | r-vCH + in-plane-rd     | 0.00        |
| 3069                      | 3146    | 64                  | 3145.98             | s-r-vCH + in-plane-rd   | 0.06        |
|                           |         | 63                  | 3146.05             | s-r-vCH + in-plane-rd   | 0.00        |
|                           |         | 62                  | 3146.09             | a-r-vCH + in-plane-rd   | 0.01        |
|                           |         | 61                  | 3146.13             | s-r-vCH + in-plane-rd   | 0.00        |
|                           |         | 60                  | 3146.26             | s-r-vCH + s-in-plane-rd | 0.00        |
|                           |         | 59                  | 3146.35             | s-r-vCH + s-in-plane-rd | 0.00        |
|                           |         | 58                  | 3146.38             | r-vCH + in-plane-rd     | 0.00        |
|                           |         | 57                  | 3146.50             | r-vCH + in-plane-rd     | 0.03        |
|                           |         | 56                  | 3146.56             | r-vCH + in-plane-rd     | 0.03        |
|                           |         | 55                  | 3146.59             | r-vCH + in-plane-rd     | 0.03        |
|                           |         | 54                  | 3146.71             | r-vCH + in-plane-rd     | 0.01        |
|                           |         | 53                  | 3146.72             | r-vCH + in-plane-rd     | 0.02        |
|                           |         | 52                  | 3146.80             | r-vCH + in-plane-rd     | 0.01        |
|                           |         | 51                  | 3146.89             | r-vCH + in-plane-rd     | 0.01        |
|                           |         | 50                  | 3147.07             | r-vCH + in-plane-rd     | 0.01        |
|                           |         | 49                  | 3147.15             | r-vCH + in-plane-rd     | 0.01        |
|                           |         | 48                  | 3149.77             | r-vCH + in-plane-rd     | 0.01        |
|                           |         | 47                  | 3149.81             | r-vCH + in-plane-rd     | 0.03        |
|                           |         | 46                  | 3149.94             | r-vCH + in-plane-rd     | 0.02        |
|                           |         | 45                  | 3149.99             | r-vCH + in-plane-rd     | 0.01        |
| 44                        | 3150.63 | r-vCH + in-plane-rd | 0.01                |                         |             |
| 43                        | 3150.65 | r-vCH + in-plane-rd | 0.01                |                         |             |
| 42                        | 3150.81 | r-vCH + in-plane-rd | 0.00                |                         |             |

Table S2

| Peaks (cm <sup>-1</sup> ) |         | Mode | v <sub>n</sub>      | Description             | IR activity |
|---------------------------|---------|------|---------------------|-------------------------|-------------|
| (exp.)                    | (calc.) |      | (cm <sup>-1</sup> ) |                         | (%)         |
|                           |         | 41   | 3150.86             | r-vCH + in-plane-rd     | 0.00        |
|                           |         | 40   | 3169.45             | r-vCH + in-plane-rd     | 0.04        |
|                           |         | 39   | 3169.52             | r-vCH + in-plane-rd     | 0.00        |
|                           |         | 38   | 3169.94             | r-vCH + in-plane-rd     | 0.00        |
|                           |         | 37   | 3169.98             | r-vCH + in-plane-rd     | 0.00        |
| 3082                      | 3170    | 36   | 3170.48             | r-vCH + in-plane-rd     | 0.00        |
|                           |         | 35   | 3170.52             | r-vCH + in-plane-rd     | 0.04        |
|                           |         | 34   | 3170.69             | r-vCH + in-plane-rd     | 0.02        |
|                           |         | 33   | 3170.77             | r-vCH + in-plane-rd     | 0.01        |
| 3295                      | 3309    | 32   | 3309.01             | vNH + vCN + δCNC        | 0.92        |
|                           |         | 31   | 3309.10             | vNH + vCN + δCNC        | 0.34        |
|                           |         | 30   | 3309.18             | vNH + δCNC              | 21.74       |
|                           |         | 29   | 3309.25             | vNH + δCNC + vOH*       | 0.45        |
|                           |         | 28   | 3309.82             | vNH + δCNC              | 0.01        |
|                           |         | 27   | 3310.30             | vNH + δCNC + vOH*       | 1.12        |
|                           |         | 26   | 3310.71             | vNH + δCNC + vOH*       | 0.02        |
|                           |         | 25   | 3311.25             | vNH + δCNC              | 8.03        |
| 3325                      | 3339    | 24   | 3339.38             | vNH + δCNC              | 0.13        |
|                           |         | 23   | 3339.49             | vNH + δCNC + vOH*       | 0.12        |
|                           |         | 22   | 3339.98             | vNH + δCNC + vOH*       | 1.40        |
|                           |         | 21   | 3340.20             | vNH + δCNC              | 0.01        |
|                           |         | 20   | 3340.28             | vNH + vCN + δCNC + vOH* | 4.00        |
|                           |         | 19   | 3340.32             | vNH + δCNC + vOH*       | 12.24       |
|                           |         | 18   | 3340.40             | vNH + δCNC              | 0.95        |
|                           |         | 17   | 3341.20             | vNH + δCNC + vOH*       | 0.42        |
| 3363                      | 3352    | 16   | 3350.90             | vNH + δCNC + vOH*       | 1.79        |
|                           |         | 15   | 3351.11             | vNH + δCNC + vOH*       | 0.74        |
|                           |         | 14   | 3351.24             | vNH + δCNC + vOH*       | 2.24        |
|                           |         | 13   | 3351.32             | vNH + δCNC + vOH*       | 4.99        |
|                           |         | 12   | 3351.42             | vNH + δCNC              | 0.08        |
|                           |         | 11   | 3351.50             | vNH + δCNC + vOH*       | 0.14        |
|                           |         | 10   | 3351.66             | vNH + δCNC + vOH*       | 0.43        |
|                           |         | 9    | 3353.11             | vNH + δCNC              | 8.13        |
| 3426                      | 3410    | 8    | 3409.74             | vNH + δCNC              | 5.27        |
|                           |         | 7    | 3409.77             | vNH + δCNC              | 0.65        |
|                           |         | 6    | 3409.85             | vNH + δCNC + vOH*       | 0.14        |
|                           |         | 5    | 3410.17             | vNH + vCN + δCNC + vOH* | 5.22        |
|                           |         | 4    | 3410.33             | vNH + δCNC              | 0.02        |
|                           |         | 3    | 3410.50             | vNH + δCNC              | 0.39        |
|                           |         | 2    | 3410.74             | vNH + vCN + δCNC + vOH* | 0.42        |
|                           |         | 1    | 3411.53             | vNH + vCN + δCNC + vOH* | 0.81        |
